# Supplementary material
Source: publisher figshare collection journal article supplement (https://acs.figshare.com/ndownloader/files/4374745)
Supplement: Supplementary file 1 [file 4374745]

# Supporting Information

## Kinase Inhibition by Deoxy Analogs of the Resorcylic Lactone L-783277

Marc Liniger,<sup>+</sup> Christian Neuhaus,<sup>+</sup> Tatjana Hofmann,<sup>+</sup> Luca Fransioli-Ignazio,<sup>+</sup> Michel Jordi,<sup>+</sup> Peter Drueckes,<sup>\$</sup> Jörg Trappe,<sup>\$</sup> Dorian Fabbro,<sup>\$</sup> Karl-Heinz Altmann<sup>+,\*</sup>

<sup>+</sup>*Swiss Federal Institute of Technology (ETH) Zurich, Department of Chemistry and Applied Biosciences, Institute of Pharmaceutical Sciences, Zurich, Switzerland, and*

<sup>\$</sup>*Novartis Institute for Biomedical Research, Center for Proteomic Chemistry, Expertise Platform Kinases, Basel, Switzerland*

*karl-heinz.altmann@pharma.ethz.ch*

### Contents

|    |                                                                                          |     |
|----|------------------------------------------------------------------------------------------|-----|
| 1. | General Methods                                                                          | S2  |
| 2. | Synthesis of 5'-deoxy L-783277 ( <b>1</b> )                                              | S2  |
| 3. | Synthesis of E-5'-deoxy L-783277 ( <b>2</b> )                                            | S15 |
| 4. | Synthesis of dideoxy L-783277 ( <b>3</b> )                                               | S17 |
| 5. | Individual IC <sub>50</sub> values for kinase inhibition by <b>L-783277</b> and <b>1</b> | S24 |

## 1. General Methods

All manipulations were conducted under an argon atmosphere using flame-dried glassware and standard syringe/septa techniques. Absolute solvents were purchased from Fluka (absolute over molecular sieves). Commercial chemicals were used without further purification. Aldehyde **4** was prepared according to literature procedures in two steps from commercially available 1,3-propanediol.

Solvents for extractions, flash column chromatography (FC) and thin layer chromatography (TLC) were purchased as commercial grade and distilled prior to use. TLC was performed on Merck TLC aluminum sheets (silica gel 60 F<sub>254</sub>). Spots were visualized with UV light ( $\lambda = 254$  nm) or through staining with Ce<sub>2</sub>(SO<sub>4</sub>)<sub>3</sub>/phosphomolybdic acid/H<sub>2</sub>SO<sub>4</sub> (CPS), vanillin/H<sub>2</sub>SO<sub>4</sub> or KMnO<sub>4</sub>/K<sub>2</sub>CO<sub>3</sub>. Chromatographic purification of products (FC) was performed using Fluka silica gel 60 for preparative column chromatography (particle size 40-63  $\mu$ m).

NMR spectra were recorded on a Bruker Avance 400 MHz NMR spectrometer at 300 K. Chemical shifts ( $\delta$ ) are reported in ppm and are either referenced to the solvent signal as an internal standard (chloroform  $\delta$  7.26 ppm for <sup>1</sup>H and  $\delta$  77.00 ppm for <sup>13</sup>C spectra; DMSO-d<sub>6</sub>  $\delta$  2.50 ppm for <sup>1</sup>H and  $\delta$  39.43 ppm for <sup>13</sup>C spectra) or to TMS for benzene-d<sub>6</sub>. Data are reported as follows: s = singlet, d = doublet, t = triplet, q = quartet, quint = quintet, sext = sextet, m = multiplet, m<sub>c</sub> = centered multiplet, br = broad signal, *J* = coupling constant in Hz. All <sup>13</sup>C-NMR spectra were measured with complete proton decoupling. <sup>1</sup>H- and <sup>13</sup>C-signals were assigned using DEPT135 experiments and two-dimensional correlation experiments (COSY, HMQC, HMBC, NOESY). IR spectra were recorded on a Jasco FT/IR-6200 instrument as thin film. Optical rotations were measured on a Jasco P-1020 polarimeter operating at the sodium D line ( $\lambda = 589$  nm) and are reported as follows:  $[\alpha]_D^{25}$ , concentration (*c* in g/100 mL) and solvent. Melting points were obtained in open capillary tubes using a Büchi melting point apparatus B-540 and are uncorrected. Mass spectra were recorded by the ETH Zürich MS service; HRMS (ESI) spectra were measured on a Bruker Daltonics maxis (UHR-TOF) and HRMS (EI) on a Waters Micromass AutoSpec Ultima instrument.

## 2. Synthesis of 5-deoxy L-783277 (**1**)

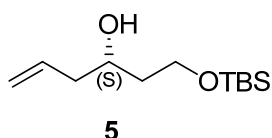

**Homoallylic alcohol 5:** A mixture of (S)-BINOL (73.7 mg, 0.26 mmol, 5 mol%) and oven-dried powdered molecular sieves (160 mg) in anhydrous toluene (9.7 mL) was treated with Ti(O*i*Pr)<sub>4</sub> (38.5  $\mu$ l, 0.13 mmol, 2.5 mol%) and stirred for 2.5 h at rt.

Aldehyde **4**<sup>1</sup> (0.97 g, 5.15 mmol, 1.0 equiv) was then added at rt and the reaction mixture was stirred for 5 min. After cooling to –78 °C allylbutyltin (2.40 ml, 7.73 mmol, 1.5 equiv) was added and the mixture was stirred for –78 °C for 10 min followed by 139 h at –20 °C. Sat. aq NaHCO<sub>3</sub> was then added and the resulting mixture was extracted with hexane. The combined organic extracts were washed with brine, dried over MgSO<sub>4</sub> and concentrated *in vacuo*. The residue was purified by FC (hexane/Et<sub>2</sub>O, 5:1) to give **5** as a yellowish oil (1.07 g, 90%, 98% *ee*).

$R_f$  = 0.24 (hexane/Et<sub>2</sub>O 5:1).

$[\alpha]_D^{24}$  = –7.8° (*c* = 0.843, CHCl<sub>3</sub>).

<sup>1</sup>H-NMR (400.1 MHz, CDCl<sub>3</sub>): δ 5.85 (tdd, *J* = 7.1, 10.2, 17.3 Hz, 1H, CH<sub>2</sub>CH=CH<sub>2</sub>), 5.14–5.06 (m, 2H, CH<sub>2</sub>CH=CH<sub>2</sub>), 3.93–3.86 (m, 2H, CHOH and CHHOSi), 3.81 (m<sub>c</sub>, 1H, CHHOSi), 3.30 (d, *J* = 1.5 Hz, 1H, OH), 2.25 (m<sub>c</sub>, 2H, CH<sub>2</sub>CH=CH<sub>2</sub>), 1.67 (m<sub>c</sub>, 2H, CH<sub>2</sub>CH<sub>2</sub>OSi), 0.90 (s, 9H, SiC(CH<sub>3</sub>)<sub>3</sub>), 0.08 (s, 6H, Si(CH<sub>3</sub>)<sub>2</sub>).

<sup>13</sup>C-NMR (100.6 MHz, CDCl<sub>3</sub>): δ 135.0 (CH<sub>2</sub>CH=CH<sub>2</sub>), 117.3 (CH<sub>2</sub>CH=CH<sub>2</sub>), 71.2 (CHOH), 62.6 (CH<sub>2</sub>OSi), 42.0 (CH<sub>2</sub>CH=CH<sub>2</sub>), 37.8 (CH<sub>2</sub>CH<sub>2</sub>OSi), 25.9 (SiC(CH<sub>3</sub>)<sub>3</sub>), 18.1 (SiC(CH<sub>3</sub>)<sub>3</sub>), –5.5 (Si(CH<sub>3</sub>)(CH<sub>3</sub>)), –5.6 (Si(CH<sub>3</sub>)(CH<sub>3</sub>)).

IR (neat, ν/cm<sup>–1</sup>): 3435w, 3078w, 2955m, 2929m, 2958m, 1642w, 1471m, 1389w, 1362w, 1255m, 1085s, 1005m, 913m, 835s, 776s, 729w, 663w.

HRMS (ESI): *m/z* calcd for C<sub>12</sub>H<sub>27</sub>O<sub>2</sub>Si [M + H]<sup>+</sup>: 231.1775, found: 231.1764.

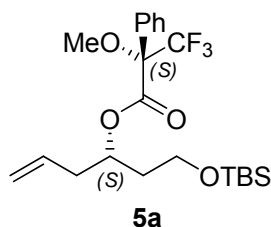

**Mosher ester 5a:** To a solution of **5** (16.0 mg, 69.4 μmol, 1.0 equiv) in 0.1 mL DCM was added pyridine (0.1 ml, 1.24 mmol, 18 equiv), DMAP (30.0 mg, 246 μmol, 3.5 equiv) and (*R*)-(-)-MTPA-Cl (37.0 μL, 198 μmol, 2.9 equiv). The reaction mixture was stirred for 16 h at rt and the reaction was then quenched with 1 mL of water. The aqueous phase was extracted with Et<sub>2</sub>O (3 x 4 mL) and the combined organic extracts were dried over MgSO<sub>4</sub>, filtered and the solvent was removed under reduced pressure. The crude product was purified by FC (hexane/Et<sub>2</sub>O 1:0 → 30:1 → 10:1) to afford *Mosher ester 5a* as a colorless oil (30.0 mg, 97%, 98% *de*). The diastereoisomeric excess was determined by <sup>1</sup>H-NMR and chiral HPLC.

$R_f$  = 0.43 (hexane/ Et<sub>2</sub>O 10:1).

$[\alpha]_D^{24}$  = +1.0° (*c* = 0.855, CHCl<sub>3</sub>).

<sup>1</sup> Mortensen, M. S.; Osbourn, J. M.; O'Doherty, G. A. *Org. Lett.* **2007**, 9, 3105–3108.

**<sup>1</sup>H-NMR** (400.1 MHz, CDCl<sub>3</sub>): δ 7.54 (m<sub>c</sub>, 2H, Ph-*o*-CH), 7.42-7.37 (m, 3H, Ph-*m*-CH and Ph-*p*-CH), 5.66 (m<sub>c</sub>, 1H, CH<sub>2</sub>CH=CH<sub>2</sub>), 5.31 (m<sub>c</sub>, 1H, CHOH), 5.07-5.00 (m, 2H, CH<sub>2</sub>CH=CH<sub>2</sub>), 3.65 (m<sub>c</sub>, 2H, CH<sub>2</sub>OSi), 3.54 (d, *J* = 1.18 Hz, 3H, OCH<sub>3</sub>), 2.41 (m<sub>c</sub>, 2H, CH<sub>2</sub>CH=CH<sub>2</sub>), 1.86 (m<sub>c</sub>, 2H, CH<sub>2</sub>CH<sub>2</sub>OSi), 0.89 (s, 9H, SiC(CH<sub>3</sub>)<sub>3</sub>), 0.04 (s, 6H, Si(CH<sub>3</sub>)<sub>2</sub>).

**<sup>13</sup>C-NMR** (100.6 MHz, CDCl<sub>3</sub>): δ 166.0 (C=O), 132.7 (CH<sub>2</sub>CH=CH<sub>2</sub>), 132.3 (Ph-*i*-C), 129.5 (Ph-*p*-C), 128.3 (Ph-*m*-C), 127.5 (Ph-*o*-C), 123.4 (q, *J* = 288 Hz, CF<sub>3</sub>), 118.4 (CH<sub>2</sub>CH=CH<sub>2</sub>), 84.6 (q, *J* = 27.6 Hz, COCH<sub>3</sub>), 73.8 (CHOH), 59.0 (CH<sub>2</sub>OSi), 55.3 (OCH<sub>3</sub>), 38.3 (CH<sub>2</sub>CH=CH<sub>2</sub>), 36.2 (CH<sub>2</sub>CH<sub>2</sub>OSi), 25.8 (SiC(CH<sub>3</sub>)<sub>3</sub>), 18.2 (SiC(CH<sub>3</sub>)<sub>3</sub>), -5.4 (Si(CH<sub>3</sub>)<sub>2</sub>).

**IR** (neat, ν/cm<sup>-1</sup>): 3078w, 2954m, 2930m, 2858m, 1746s, 1644w, 1472w, 1389w, 1254s, 1168s, 1099s, 1018s, 993m, 964w, 919w, 836s, 776s, 717m, 664w.

**HRMS (ESI)**: *m/z* calcd for C<sub>22</sub>H<sub>34</sub>F<sub>3</sub>O<sub>4</sub>Si [M + H]<sup>+</sup>: 447.2173, found: 447.2167.

**HPLC** (Daicel Chiracel OD, hexane, 100%, 25 °C, 0.5 mL/min, UV): *t*<sub>R</sub>/min = 12.0 (*RS*), 20.1 (*SS*).

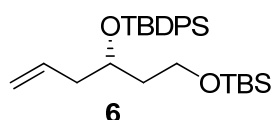

**Protected diol 6**: A stirred solution of **5** (2.10 g, 9.11 mmol, 1.0 equiv) in dry DMF (4.6 mL) was treated at rt with imidazole (1.86 g, 27.3 mmol, 3.0 equiv) followed by TBDPSCI (3.31 mL, 12.8 mmol, 1.4 equiv). After stirring for 21 h the reaction mixture was diluted with EtOAc (30 mL). The resulting mixture was washed with brine (6 x 20 mL), dried over MgSO<sub>4</sub> and concentrated *in vacuo*. The residue was purified by FC (hexane/Et<sub>2</sub>O, 1:0 → 100:1) to give **6** (3.86 g, 90%) as a colorless oil.

*R*<sub>f</sub> = 0.30 (hexane/ Et<sub>2</sub>O 100:1).

[α]<sub>D</sub><sup>24</sup> = +14.5° (*c* = 0.763, CHCl<sub>3</sub>).

**<sup>1</sup>H-NMR** (400.1 MHz, CDCl<sub>3</sub>): δ 7.70 (m<sub>c</sub>, 4H, Ph-*o*-CH), 7.46-7.35 (m, 6H, Ph-*m*-CH and Ph-*p*-CH), 5.74 (tdd, *J* = 7.1, 10.2, 17.3 Hz, 1H, CH<sub>2</sub>CH=CH<sub>2</sub>), 4.95 (m<sub>c</sub>, 2H, CH<sub>2</sub>CH=CH<sub>2</sub>), 3.97 (m<sub>c</sub>, 1H, CHOSi), 3.64 (m<sub>c</sub>, 2H, CH<sub>2</sub>OSi), 2.20 (m<sub>c</sub>, 2H, CH<sub>2</sub>CH=CH<sub>2</sub>), 1.73 (m<sub>c</sub>, 2H, CH<sub>2</sub>CH<sub>2</sub>OSi), 1.08 (s, 9H, Ph<sub>2</sub>SiC(CH<sub>3</sub>)<sub>3</sub>), 0.86 (s, 9H, SiC(CH<sub>3</sub>)<sub>3</sub>), 0.00 (s, 6H, Si(CH<sub>3</sub>)<sub>2</sub>).

**<sup>13</sup>C-NMR** (100.6 MHz, CDCl<sub>3</sub>): δ 135.9 (Ph-*o*-C), 134.7 (CH<sub>2</sub>CH=CH<sub>2</sub>), 134.5 (Ph-*i*-C), 134.3 (Ph-*i*-C'), 129.5 (Ph-*p*-C), 127.5 (Ph-*m*-C), 127.4 (Ph-*m*-C'), 116.9 (CH<sub>2</sub>CH=CH<sub>2</sub>), 70.4 (CHOSi), 60.0 (CH<sub>2</sub>OSi), 41.4 (CH<sub>2</sub>CH=CH<sub>2</sub>), 39.2 (CH<sub>2</sub>CH<sub>2</sub>OSi), 27.0 (Ph<sub>2</sub>SiC(CH<sub>3</sub>)<sub>3</sub>), 25.9 (SiC(CH<sub>3</sub>)<sub>3</sub>), 19.4 (Ph<sub>2</sub>SiC(CH<sub>3</sub>)<sub>3</sub>), 18.2 (SiC(CH<sub>3</sub>)<sub>3</sub>), -5.3 (Si(CH<sub>3</sub>)<sub>2</sub>).

**IR** (neat, ν/cm<sup>-1</sup>): 3072w, 3051w, 2954m, 2930m, 2857m, 1471m, 1428m, 1389w, 1361w, 1255m, 1105s, 1006m, 912m, 835s, 775m, 739m, 701s, 611m, 507m.

**HRMS (ESI)**: *m/z* calcd for C<sub>28</sub>H<sub>45</sub>O<sub>2</sub>Si<sub>2</sub> [M + H]<sup>+</sup>: 469.2953, found: 469.2945.

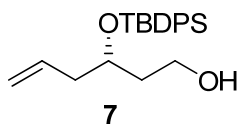

**Monoprotected diol 7:** To a solution of **6** (3.68 g, 7.86 mmol, 1.0 equiv) in 20:1 THF/water (39.5 mL) was added *p*-TsOH monohydrate (150 mg, 0.79 mmol, 0.1 equiv) and the resulting solution was stirred at rt for 10 h. Sat. NaHCO<sub>3</sub> was then added and the mixture was extracted with EtOAc (3 x 40 mL). The combined organic extracts were washed with brine, dried over MgSO<sub>4</sub> and concentrated *in vacuo*. The residue was purified by FC (hexane/Et<sub>2</sub>O 10:1 → 5:1 → 2:1) to give **7** as a colorless oil (2.55 g, 92%).

$R_f$  = 0.23 (hexane/Et<sub>2</sub>O 2:1).

$[\alpha]_D^{24}$  = +26.5° ( $c$  = 0.755, CHCl<sub>3</sub>).

**<sup>1</sup>H-NMR** (400.1 MHz, CDCl<sub>3</sub>):  $\delta$  7.71 (m<sub>c</sub>, 4H, Ph-*o*-CH), 7.48-7.37 (m, 6H, Ph-*m*-CH and Ph-*p*-CH), 5.61 (ddt,  $J$  = 7.2, 10.2, 17.3 Hz, 1H, CH<sub>2</sub>CH=CH<sub>2</sub>), 4.91 (m<sub>c</sub>, 2H, CH<sub>2</sub>CH=CH<sub>2</sub>), 3.99 (m<sub>c</sub>, 1H, CHOSi), 3.77 (ddd,  $J$  = 4.9, 8.3, 11.0 Hz, 1H, CHHOH), 3.67 (dt,  $J$  = 5.5, 11.0 Hz, 1H, CHHOH), 2.30 (dt,  $J$  = 7.7, 14.1 Hz, 1H, CHHCH=CH<sub>2</sub>), 2.19 (m<sub>c</sub>, 1H, CHHCH=CH<sub>2</sub>), 1.88-1.78 (m, 2H, CH<sub>2</sub>OH and CHHCH<sub>2</sub>OH), 1.67 (ddd,  $J$  = 5.5, 11.2, 14.3 Hz, 1H, CHHCH<sub>2</sub>OH), 1.08 (s, 9H, Ph<sub>2</sub>SiC(CH<sub>3</sub>)<sub>3</sub>).

**<sup>13</sup>C-NMR** (100.6 MHz, CDCl<sub>3</sub>):  $\delta$  135.9 (Ph-*o*-C), 134.2 (CH<sub>2</sub>CH=CH<sub>2</sub>), 133.9 (Ph-*i*-C), 133.6 (Ph-*i*-C'), 129.8 (Ph-*p*-C), 129.7 (Ph-*p*-C'), 127.7 (Ph-*m*-C), 127.6 (Ph-*m*-C'), 117.3 (CH<sub>2</sub>CH=CH<sub>2</sub>), 71.7 (CHOSi), 59.7 (CH<sub>2</sub>OH), 41.1 (CH<sub>2</sub>CH=CH<sub>2</sub>), 37.5 (CH<sub>2</sub>CH<sub>2</sub>OH), 27.0 (Ph<sub>2</sub>SiC(CH<sub>3</sub>)<sub>3</sub>), 19.3 (Ph<sub>2</sub>SiC(CH<sub>3</sub>)<sub>3</sub>).

**IR** (neat, v/cm<sup>-1</sup>): 3370w, 3072w, 2931m, 2889w, 2858m, 1640w, 1590w, 1472m, 1428m, 1390w, 1362w, 1105s, 1169m, 1106m, 915m, 822m, 739m, 701s, 611m, 506s.

**HRMS (ESI):**  $m/z$  calcd for C<sub>22</sub>H<sub>31</sub>O<sub>2</sub>Si [M + H]<sup>+</sup>: 355.2088, found: 355.2085.

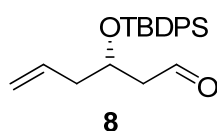

**Aldehyde 8:** To a solution of oxalylchloride (0.89 ml, 10.6 mmol, 1.5 equiv) in DCM (62 mL) at -78 °C was added dropwise DMSO (1.50 ml, 21.2 mmol, 3.0 equiv) in 39 mL DCM. After stirring at -78 °C for 10 min a solution of **7** (2.50 g, 7.05 mmol, 1.0 equiv) in DCM (23 mL) was added dropwise. The resultant cloudy mixture was stirred at -78 °C for 60 min, TEA (3.93 mL, 28.2 mmol, 4.0 equiv) was added slowly and the reaction mixture was allowed to warm to room temperature (60 min). The reaction was quenched with water (125 mL) and the layers were separated. The aqueous phase was extracted with DCM (3 x 100 mL) and the combined organic

phases were washed with brine, dried over  $\text{MgSO}_4$ , filtered and concentrated *in vacuo*. The crude product was purified by FC (hexane/ $\text{Et}_2\text{O}$  5:1) to give **8** (2.34 g, 94%) as a yellowish oil.

$R_f$  = 0.41 (hexane/  $\text{Et}_2\text{O}$  5:1).

$[\alpha]_D^{24}$  = +17.7° ( $c$  = 1.08,  $\text{CHCl}_3$ ).

**$^1\text{H-NMR}$**  (400.1 MHz,  $\text{CDCl}_3$ ):  $\delta$  9.70 (t,  $J$  = 2.4 Hz, 1H, CHO), 7.69 (m<sub>c</sub>, 4H, Ph-*o*-CH), 7.48-7.37 (m, 6H, Ph-*m*-CH and Ph-*p*-CH), 5.68 (tdd,  $J$  = 7.2, 10.2, 17.3 Hz, 1H,  $\text{CH}_2\text{CH}=\text{CH}_2$ ), 5.03 (m<sub>c</sub>, 1H,  $\text{CH}_2\text{CH}=\text{CHH}$ ), 4.96 (ddd,  $J$  = 1.4, 3.3, 17.1 Hz, 1H,  $\text{CH}_2\text{CH}=\text{CHH}$ ), 4.28 (m<sub>c</sub>, 1H, CHOSi), 2.52 (ddd,  $J$  = 1.4, 2.3, 5.9 Hz, 2H,  $\text{CH}_2\text{CHO}$ ), 2.29 (m<sub>c</sub>, 2H,  $\text{CH}_2\text{CH}=\text{CH}_2$ ), 1.07 (s, 9H,  $\text{Ph}_2\text{SiC}(\text{CH}_3)_3$ ).

**$^{13}\text{C-NMR}$**  (100.6 MHz,  $\text{CDCl}_3$ ):  $\delta$  201.7 (CHO), 135.8 (Ph-*o*-C), 133.7 (Ph-*i*-C), 133.5 ( $\text{CH}_2\text{CH}=\text{CH}_2$ ), 133.4 (Ph-*i*-C'), 129.9 (Ph-*p*-C), 129.8 (Ph-*p*-C'), 127.7 (Ph-*m*-C), 127.6 (Ph-*m*-C'), 118.3 ( $\text{CH}_2\text{CH}=\text{CH}_2$ ), 68.8 (CHOSi), 49.8 ( $\text{CH}_2\text{CHO}$ ), 41.8 ( $\text{CH}_2\text{CH}=\text{CH}_2$ ), 26.9 ( $\text{Ph}_2\text{SiC}(\text{CH}_3)_3$ ), 19.2 ( $\text{Ph}_2\text{SiC}(\text{CH}_3)_3$ ).

**IR** (neat,  $\text{v}/\text{cm}^{-1}$ ): 3072w, 2958w, 2931m, 2893w, 2858m, 1725s, 1472m, 1428m, 1391w, 1362w, 1105s, 998m, 919m, 822m, 741m, 701s, 612m, 507s, 489s.

**HRMS (ESI)**:  $m/z$  calcd for  $\text{C}_{12}\text{H}_{32}\text{NO}_2\text{Si}$  [ $\text{M} + \text{NH}_4$ ]<sup>+</sup>: 370.2197, found: 370.2203.

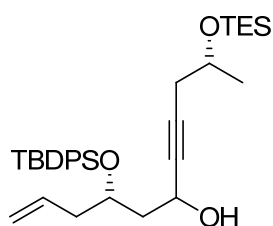

**10**

**Acetylene 10**: To a solution of **9** (1.53 g, 7.73 mmol, 1.2 equiv) in 41 mL abs. THF was added dropwise  $n\text{-BuLi}$  (4.83 mL, 7.73 mmol, 1.2 equiv) at  $-78^\circ\text{C}$  over a period of 10 min and the mixture was then stirred for 30 min at  $-10^\circ\text{C}$ . After re-cooling to  $-78^\circ\text{C}$  and a pre-cooled solution ( $-78^\circ\text{C}$ ) of **8** (2.27 g, 6.44 mmol 1.0 equiv) in 31 mL abs. THF was added dropwise over a period of 20 min. After stirring for 45 min at  $-78^\circ\text{C}$ , the solution was allowed to warm to rt (1.5 h) and the reaction was quenched by adding sat.  $\text{NH}_4\text{Cl}$  to give a yellow solution. The layers were separated and the aqueous phase was extracted with  $\text{Et}_2\text{O}$  (3 x 90 mL). The combined organic extracts were dried over  $\text{MgSO}_4$ , filtered and evaporated *in vacuo*. The crude product was purified by FC (hexane/ $\text{Et}_2\text{O}$  6:1  $\rightarrow$  4:1) to give a diastereoisomeric mixture of **10** as a yellow oil (3.29 g, 93%, dr 1:1).

$R_f$  = 0.38 (dia1), 0.33 (dia2) (hexane/ $\text{Et}_2\text{O}$  4:1).

**$^1\text{H-NMR}$**  (400.1 MHz,  $\text{CDCl}_3$ ):  $\delta$  7.75-7.68 (m, 8H, Ph-*o*-CH), 7.48-7.35 (m, 12H, Ph-*m*-CH and Ph-*p*-CH), 5.58 (tdt,  $J$  = 7.2, 10.2, 17.4 Hz, 2H,  $\text{CH}_2\text{CH}=\text{CH}_2$ ), 4.93 (ddd,  $J$  = 1.0, 1.9, 10.2 Hz, 2H,  $\text{CH}_2\text{CH}=\text{CHH}$ ), 4.84 (dddd,  $J$  = 1.3, 3.3, 4.6, 17.1 Hz, 2H,  $\text{CH}_2\text{CH}=\text{CHH}$ ), 4.58 (m<sub>c</sub>, 2H, CHOH), 4.05 (m<sub>c</sub>, 2H,  $\text{CHCH}_2\text{CHOH}$ ), 3.90 (m<sub>c</sub>, 2H,

CHCH<sub>3</sub>), 2.60 (d, *J* = 0.5 Hz, 1H, OH), 2.42-2.31 (m, 2H, CCCHH), 2.30-2.08 (m, 7H, CCCHH, OH' and CH<sub>2</sub>CH=CH<sub>2</sub>), 1.98-1.79 (m, 4H, CH<sub>2</sub>CHOH), 1.21 (dd, *J* = 6.1, 7.7 Hz, 6H, CHCH<sub>3</sub>), 1.06 (d, *J* = 5.6 Hz, 18H, SiC(CH<sub>3</sub>)<sub>3</sub>), 0.96 (dt, *J* = 1.1, 7.9 Hz, 18H, Si(CH<sub>2</sub>CH<sub>3</sub>)<sub>3</sub>), 0.60 (dq, *J* = 2.5, 8.0 Hz, 12H, Si(CH<sub>2</sub>CH<sub>3</sub>)<sub>3</sub>).

**<sup>13</sup>C-NMR** (100.6 MHz, CDCl<sub>3</sub>): δ 135.9 (Ph-*o*-C), 134.1 (Ph-*i*-C), 134.0 (CH<sub>2</sub>CH=CH<sub>2</sub>), 133.9 (Ph-*i*-C'), 133.8 (CH<sub>2</sub>CH=CH<sub>2</sub>'), 133.6 (Ph-*i*-C''), 133.3 (Ph-*i*-C'''), 129.8 (Ph-*p*-C), 129.7 (Ph-*p*-C'), 129.6 (Ph-*p*-C''), 127.7 (Ph-*m*-C), 127.6 (Ph-*m*-C'), 127.5 (Ph-*m*-C''), 117.6 (CH<sub>2</sub>CH=CH<sub>2</sub>), 117.5 (CH<sub>2</sub>CH=CH<sub>2</sub>'), 82.7 (CC), 82.6 (CC'), 82.5 (CC''), 82.2 (CC'''), 71.6 (CHCH<sub>2</sub>CHOH), 70.9 (CHCH<sub>2</sub>CHOH'), 67.5 (CHCH<sub>3</sub>), 67.4 (CHCH<sub>3</sub>'), 61.0 (CHOH), 59.5 (CHOH'), 44.2 (CH<sub>2</sub>CHOH), 43.0 (CH<sub>2</sub>CHOH'), 41.7 (CH<sub>2</sub>CH=CH<sub>2</sub>), 41.1 (CH<sub>2</sub>CH=CH<sub>2</sub>'), 29.7 (CCCH<sub>2</sub>), 27.0 (SiC(CH<sub>3</sub>)<sub>3</sub>), 23.4 (CHCH<sub>3</sub>), 23.3 (CHCH<sub>3</sub>'), 19.3 (SiC(CH<sub>3</sub>)<sub>3</sub>), 6.8 (Si(CH<sub>2</sub>CH<sub>3</sub>)<sub>3</sub>), 4.8 (Si(CH<sub>2</sub>CH<sub>3</sub>)<sub>3</sub>).

**IR** (neat, ν/cm<sup>-1</sup>): 3431w, 3072w, 2955m, 2932w, 2877w, 1472w, 1428m, 1377w, 1238w, 1105s, 1078m, 998s, 912m, 853w, 822m, 736s, 701s, 611m, 505s.

**HRMS (ESI)**: *m/z* calcd for C<sub>33</sub>H<sub>51</sub>O<sub>3</sub>Si<sub>2</sub> [M + H]<sup>+</sup>: 551.3371, found: 551.3360.

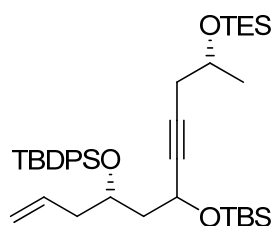

**11**

**Protected triol 11**: To a stirred solution of **10** (3.23 g, 5.86 mmol, 1.0 equiv) in dry DMF (3 mL) was added imidazole (1.20 g, 17.6 mmol, 3.0 equiv) at rt followed by TBSCl (1.24 g, 8.21 mmol, 1.4 equiv). After stirring for 15 h at rt the reaction mixture was diluted with EtOAc (60 mL). The resulting mixture was washed with brine (3 x 40 mL) and the combined aqueous extracts were re-extracted once with EtOAc (90 mL). The combined organic extracts were dried over MgSO<sub>4</sub> and concentrated *in vacuo*. The residue was purified by FC (hexane/Et<sub>2</sub>O 50:1) to give **11** (3.74 g, 96%) as a yellowish oil.

**R<sub>f</sub>** = 0.19 (hexane/ Et<sub>2</sub>O 50:1).

**<sup>1</sup>H-NMR** (400.1 MHz, CDCl<sub>3</sub>): δ 7.72-7.66 (m, 8H, Ph-*o*-CH), 7.45-7.33 (m, 12H, Ph-*m*-CH and Ph-*p*-CH), 5.68 (tdt, *J* = 7.1, 10.2, 17.4 Hz, 2H, CH<sub>2</sub>CH=CH<sub>2</sub>), 4.99-4.82 (m, 4H, CH<sub>2</sub>CH=CH<sub>2</sub>), 4.56 (m<sub>c</sub>, 1H, CCCHOSi), 4.44 (m<sub>c</sub>, 1H, CCCHOSi'), 4.01 (m<sub>c</sub>, 2H, CHCH<sub>2</sub>CH=CH<sub>2</sub>), 3.86 (m<sub>c</sub>, 2H, CHCH<sub>3</sub>), 2.38-2.29 (m, 2H, CCCHH), 2.24-2.07 (m, 6H, CCCHH, and CH<sub>2</sub>CH=CH<sub>2</sub>), 1.97-1.79 (m, 4H, CH<sub>2</sub>CHCC), 1.19 (dd, *J* = 1.9, 6.0 Hz, 6H, CHCH<sub>3</sub>), 1.06 (d, *J* = 1.3 Hz, 18H, Ph<sub>2</sub>SiC(CH<sub>3</sub>)<sub>3</sub>), 0.96 (dt, *J* = 0.5, 7.8 Hz, 18H, Si(CH<sub>2</sub>CH<sub>3</sub>)<sub>3</sub>), 0.85 (d, *J* = 13.1 Hz, 18H, (CH<sub>3</sub>)<sub>2</sub>SiC(CH<sub>3</sub>)<sub>3</sub>), 0.60 (dq, *J* = 1.4, 7.9 Hz, 12H, Si(CH<sub>2</sub>CH<sub>3</sub>)<sub>3</sub>), 0.10-0.01 (m, 12 H, (CH<sub>3</sub>)<sub>2</sub>SiC(CH<sub>3</sub>)<sub>3</sub>).

**<sup>13</sup>C-NMR** (100.6 MHz, CDCl<sub>3</sub>): δ 135.9 (Ph-*o*-C), 134.6 (Ph-*i*-C), 134.5 (Ph-*i*-C'), 134.4 (CH<sub>2</sub>CH=CH<sub>2</sub>), 134.3 (CH<sub>2</sub>CH=CH<sub>2</sub>'), 134.2 (Ph-*i*-C''), 134.0 (Ph-*i*-C'''), 129.5 (Ph-*p*-C), 129.4 (Ph-*p*-C'), 127.5 (Ph-*m*-C), 127.4 (Ph-*m*-C'), 117.2 (CH<sub>2</sub>CH=CH<sub>2</sub>), 117.1 (CH<sub>2</sub>CH=CH<sub>2</sub>'), 83.3 (CHCC), 83.1 (CHCC'), 82.0 (CHCC), 70.3 (CHCH<sub>2</sub>CH=CH<sub>2</sub>), 70.2 (CHCH<sub>2</sub>CH=CH<sub>2</sub>'), 67.5 (CHCH<sub>3</sub>), 67.4 (CHCH<sub>3</sub>'), 61.0 (CCCHOSi), 60.0 (CCCHOSi'), 45.8 (CH<sub>2</sub>CHCC), 45.4 (CH<sub>2</sub>CHCC'), 41.4 (CH<sub>2</sub>CH=CH<sub>2</sub>), 29.8 (CCCH<sub>2</sub>), 27.0 (Ph<sub>2</sub>SiC(CH<sub>3</sub>)<sub>3</sub>), 25.8 ((CH<sub>3</sub>)<sub>2</sub>SiC(CH<sub>3</sub>)<sub>3</sub>), 23.3 (CHCH<sub>3</sub>), 23.2 (CHCH<sub>3</sub>'), 19.4 (Ph<sub>2</sub>SiC(CH<sub>3</sub>)<sub>3</sub>), 18.2 ((CH<sub>3</sub>)<sub>2</sub>SiC(CH<sub>3</sub>)<sub>3</sub>), 6.8 (Si(CH<sub>2</sub>CH<sub>3</sub>)<sub>3</sub>), 4.8 (Si(CH<sub>2</sub>CH<sub>3</sub>)<sub>3</sub>'), -4.2 ((CH<sub>3</sub>)<sub>2</sub>SiC(CH<sub>3</sub>)<sub>3</sub>), -4.5 ((CH<sub>3</sub>)<sub>2</sub>SiC(CH<sub>3</sub>)<sub>3</sub>'), -4.8 ((CH<sub>3</sub>)<sub>2</sub>SiC(CH<sub>3</sub>)<sub>3</sub>'), -5.0 ((CH<sub>3</sub>)<sub>2</sub>SiC(CH<sub>3</sub>)<sub>3</sub>''').

**IR** (neat, ν/cm<sup>-1</sup>): 3073w, 2955m, 2930m, 2878m, 2858m, 1472w, 1428m, 1376w, 1361w, 1251m, 1080s, 999s, 914w, 836s, 776s, 737s, 701s, 611m, 506s, 487m.

**HRMS (ESI)**: *m/z* calcd for C<sub>39</sub>H<sub>68</sub>NO<sub>3</sub>Si<sub>3</sub> [M + NH<sub>4</sub>]<sup>+</sup>: 682.4502, found: 682.4498.

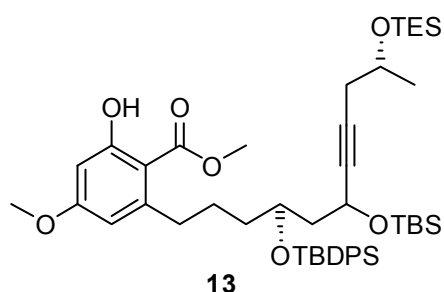

**Ester 13**: To a solution of **11** (1.12 g, 1.69 mmol, 1.10 equiv) in 4.5 mL THF was added a 0.5 M solution of 9-BBN (5.10 mL, 2.55 mmol, 1.67 equiv) in THF and the mixture was stirred at rt for 5 h. Then a 2 M solution of K<sub>3</sub>PO<sub>4</sub> (1.53 mL, 3.06 mmol, 2.00 equiv) was added to the mixture (solution A). In a separate flask aryl bromide **12** (400 mg, 1.53 mmol, 1.00 equiv), trifurylphosphine (285 mg, 1.23 mmol, 0.80 equiv) and [Pd(OAc)<sub>2</sub>] (68.8 mg, 0.31 mmol, 0.20 equiv) were dissolved in 1.5 mL degassed abs. DME (solution B) and stirred for 5 min to give an orange suspension. Solution A was added to solution B at rt (1.5 mL THF washing) and the reaction mixture was refluxed for 19 h. Sat. NH<sub>4</sub>Cl was then added, the phases were separated, and the aqueous solution was extracted with EtOAc (3 x 75 mL). The combined organic extracts were dried over MgSO<sub>4</sub>, filtered and the solvent was removed under reduced pressure. The residue was purified by FC (hexane/EtOAc 100:1 → 90:1 → 80:1 → 70:1, then 10:1) to give **13** as a colorless oil (2.03 g, 68%).

*R<sub>f</sub>* = 0.46 (hexane/EtOAc 10:1).

**<sup>1</sup>H-NMR** (400.1 MHz, CDCl<sub>3</sub>): δ 11.75 (d, *J* = 3.8 Hz, 2H, -OH), 7.69-7.62 (m, 8H, Ph-*o*-CH), 7.44-7.30 (m, 12H, Ph-*m*-CH and Ph-*p*-CH), 6.31 (dd, *J* = 0.6, 2.6 Hz, 1H, CH<sub>Ar</sub>COH), 6.12 (t, *J* = 2.5 Hz, 2H, CH<sub>Ar</sub>COCH<sub>3</sub>), 4.56 (m<sub>c</sub>, 1H, CHOTBS), 4.45 (m<sub>c</sub>, 1H, CHOTBS'), 4.02-3.93 (m, 2H, CHOTBDPS), 3.93-3.80 (m, 2H, CHOTES), 3.77 (s, 6H, C<sub>Ar</sub>OCH<sub>3</sub>), 3.77 (d, *J* = 0.9 Hz, 6H, COOCH<sub>3</sub>), 2.70-2.46 (m, 4H, C<sub>Ar</sub>CH<sub>2</sub>), 2.39-2.29 (m, 2H, CHHCHCH<sub>3</sub>), 2.20 (m<sub>c</sub>, 2H, CHHCHCH<sub>3</sub>), 1.96-1.68 (m, 4H,



CH<sub>2</sub>CHOTBS), 1.42-1.35 (m, 8H, CH<sub>2</sub>CH<sub>2</sub>CHOTBDPS and CH<sub>2</sub>CH<sub>2</sub>CHOTBDPS), 1.20 (dd, *J* = 4.8, 5.9 Hz, 6H, CHCH<sub>3</sub>), 1.03 (d, *J* = 2.7 Hz, 18H, Ph<sub>2</sub>SiC(CH<sub>3</sub>)<sub>3</sub>), 0.95 (dt, *J* = 6.2, 7.9 Hz, 18H, Si(CH<sub>2</sub>CH<sub>3</sub>)<sub>3</sub>), 0.85 (d, *J* = 16.8 Hz, 18H, (CH<sub>3</sub>)<sub>2</sub>SiC(CH<sub>3</sub>)<sub>3</sub>), 0.59 (quint, *J* = 7.7 Hz, 12H, Si(CH<sub>2</sub>CH<sub>3</sub>)<sub>3</sub>), 0.10-0.00 (m, 12H, (CH<sub>3</sub>)<sub>2</sub>SiC(CH<sub>3</sub>)<sub>3</sub>).

**<sup>13</sup>C-NMR** (100.6 MHz, CDCl<sub>3</sub>): δ 171.8 (C=O), 165.6 (C<sub>Ar</sub>OH), 163.9 (C<sub>Ar</sub>OCH<sub>3</sub>), 147.4 (C<sub>Ar</sub>CH<sub>2</sub>), 135.9 (Ph-*o*-C), 135.8 (Ph-*o*-C'), 134.7 (Ph-*i*-C), 134.6 (Ph-*i*-C'), 134.3 (Ph-*i*-C''), 134.0 (Ph-*i*-C'''), 129.5 (Ph-*p*-C), 129.4 (Ph-*p*-C'), 127.5 (Ph-*m*-C), 127.4 (Ph-*m*-C'), 110.6 (CH<sub>Ar</sub>C<sub>Ar</sub>CH<sub>2</sub>), 104.5 (C<sub>Ar</sub>COOCH<sub>3</sub>), 98.9 (CH<sub>Ar</sub>COH), 98.8 (CH<sub>Ar</sub>COH'), 83.5 (CHCC), 83.2 (CHCC'), 82.1 (CHCC), 81.9 (CHCC'), 70.6 (CHOTBDPS), 70.5 (CHOTBDPS'), 67.4 (CHOTES), 61.2 (CHOTBS), 60.2 (CHOTBS'), 55.2 (C<sub>Ar</sub>OCH<sub>3</sub>), 51.8 (COOCH<sub>3</sub>), 46.3 (CH<sub>2</sub>CHOTBS), 45.6 (CH<sub>2</sub>CHOTBS'), 37.1 (CH<sub>2</sub>CHOTBDPS), 36.9 (CH<sub>2</sub>CHOTBDPS'), 36.6 (C<sub>Ar</sub>CH<sub>2</sub>), 29.8 (CH<sub>2</sub>CHCH<sub>3</sub>), 27.0 (Ph<sub>2</sub>SiC(CH<sub>3</sub>)<sub>3</sub>), 26.8 (CH<sub>2</sub>CH<sub>2</sub>CHOTBDPS), 26.7 (CH<sub>2</sub>CH<sub>2</sub>CHOTBDPS'), 25.8 ((CH<sub>3</sub>)<sub>2</sub>SiC(CH<sub>3</sub>)<sub>3</sub>), 23.3 (CHCH<sub>3</sub>), 23.2 (CHCH<sub>3</sub>'), 19.4 (Ph<sub>2</sub>SiC(CH<sub>3</sub>)<sub>3</sub>), 18.2 ((CH<sub>3</sub>)<sub>2</sub>SiC(CH<sub>3</sub>)<sub>3</sub>), 18.1 ((CH<sub>3</sub>)<sub>2</sub>SiC(CH<sub>3</sub>)<sub>3</sub>'), 6.8 (Si(CH<sub>2</sub>CH<sub>3</sub>)<sub>3</sub>), 4.8 (Si(CH<sub>2</sub>CH<sub>3</sub>)<sub>3</sub>), -4.1 ((CH<sub>3</sub>)<sub>2</sub>SiC(CH<sub>3</sub>)<sub>3</sub>), -4.5 ((CH<sub>3</sub>)<sub>2</sub>SiC(CH<sub>3</sub>)<sub>3</sub>'), -4.9 ((CH<sub>3</sub>)<sub>2</sub>SiC(CH<sub>3</sub>)<sub>3</sub>'), -5.1 ((CH<sub>3</sub>)<sub>2</sub>SiC(CH<sub>3</sub>)<sub>3</sub>'''), -5.1 ((CH<sub>3</sub>)<sub>2</sub>SiC(CH<sub>3</sub>)<sub>3</sub>''').

**IR** (neat, ν/cm<sup>-1</sup>): 3071w, 2954m, 2931m, 2878w, 2857w, 1653m, 1616m, 1577w, 1462w, 1435m, 1377w, 1326m, 1255s, 1215m, 1158m, 1104m, 1000m, 957w, 836m, 756s, 738s, 701s, 611m, 506m.

**HRMS (ESI)**: *m/z* calcd for C<sub>48</sub>H<sub>78</sub>NO<sub>7</sub>Si<sub>3</sub> [M + NH<sub>4</sub>]<sup>+</sup>: 864.5081, found: 864.5080.

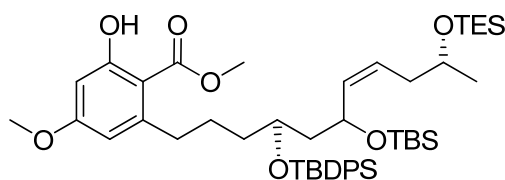

**14**

**Ester 14**: To a solution of **13** (831 mg, 981 μmol, 1.00 equiv) in EtOAc (7.6 mL) was added *Lindlar* catalyst (105 mg, 49.3 μmol, 5 mol%). The mixture was stirred under a hydrogen atmosphere (7.5 bar) and the progress of the reaction was monitored by MS. After 50 min the suspension was filtered through celite, the solvent was removed under reduced pressure and the residue was purified by FC (hexane/Et<sub>2</sub>O 100:0 → 50:1 → 10:1) to give **14** as a colorless oil (812 mg, 97%).

**R<sub>f</sub>** = 0.41 (hexane/Et<sub>2</sub>O, 10:1).

**<sup>1</sup>H-NMR** (400.1 MHz, CDCl<sub>3</sub>): δ 11.76 (d, *J* = 4.9 Hz, 2H, -OH), 7.69-7.60 (m, 8H, Ph-*o*-CH), 7.44-7.29 (m, 12H, Ph-*m*-CH and Ph-*p*-CH), 6.32 (dd, *J* = 2.6, 6.6 Hz, 2H, CH<sub>Ar</sub>COH), 6.19 (d, *J* = 2.6 Hz, 1H, CH<sub>Ar</sub>COCH<sub>3</sub>), 6.12 (d, *J* = 2.6 Hz, 1H, CH<sub>Ar</sub>COCH<sub>3</sub>'), 5.35-5.21 (m, 4H, CH=CH), 4.52 (dt, *J* = 4.6, 8.1 Hz 1H, CHOTBS), 4.38 (m<sub>c</sub>, 1H, CHOTBS'), 3.97 (m<sub>c</sub>, 1H, CHOTBDPS), 3.89 (m<sub>c</sub>, 1H, CHOTBDPS'), 3.86-3.76 (m, 2H, CHOTES), 3.79 (d, *J* = 13.8 Hz, 6H, COOCH<sub>3</sub>), 3.78 (d, *J* = 4.9 Hz, 6H, C<sub>Ar</sub>OCH<sub>3</sub>), 2.81-2.52 (m, 4H, C<sub>Ar</sub>CH<sub>2</sub>), 2.22-1.99 (m, 4H, CH<sub>2</sub>CHCH<sub>3</sub>), 1.84-1.37

(m, 12H,  $\text{CH}_2\text{CHOTBS}$ ,  $\text{CH}_2\text{CH}_2\text{CHOTBDPS}$  and  $\text{CH}_2\text{CH}_2\text{CHOTBDPS}$ ), 1.09 (dd,  $J = 2.1, 6.1$  Hz, 6H,  $\text{CHCH}_3$ ), 1.03 (d,  $J = 0.7$  Hz, 18H,  $\text{Ph}_2\text{SiC}(\text{CH}_3)_3$ ), 0.96 (t,  $J = 7.9$  Hz, 18H,  $\text{Si}(\text{CH}_2\text{CH}_3)_3$ ), 0.78 (d,  $J = 20.3$  Hz, 18H,  $(\text{CH}_3)_2\text{SiC}(\text{CH}_3)_3$ ), 0.59 (m, 12H,  $\text{Si}(\text{CH}_2\text{CH}_3)_3$ ), -0.07 (dd,  $J = 11.5, 14.0$  Hz, 12H,  $(\text{CH}_3)_2\text{SiC}(\text{CH}_3)_3$ ).

**$^{13}\text{C}$ -NMR** (100.6 MHz,  $\text{CDCl}_3$ ):  $\delta$  171.9 (C=O), 171.8 (C=O'), 165.6 ( $\text{C}_{\text{Ar}}\text{OH}$ ), 165.5 ( $\text{C}_{\text{Ar}}\text{OH}'$ ), 163.9 ( $\text{C}_{\text{Ar}}\text{OCH}_3$ ), 147.6 ( $\text{C}_{\text{Ar}}\text{CH}_2$ ), 147.5 ( $\text{C}_{\text{Ar}}\text{CH}_2'$ ), 135.8 (Ph-*o*-C), 135.4 ( $\text{CHCH}_2\text{CHCH}_3$ ), 135.2 ( $\text{CHCH}_2\text{CHCH}_3'$ ), 134.9 (Ph-*i*-C), 134.7 (Ph-*i*-C'), 134.6 (Ph-*i*-C''), 134.4 (Ph-*i*-C'''), 129.4 (Ph-*p*-C), 129.3 (Ph-*p*-C'), 127.5 (Ph-*m*-C), 127.4 (Ph-*m*-C'), 125.5 ( $\text{CHCHOTBS}$ ), 125.0 ( $\text{CHCHOTBS}'$ ), 110.7 ( $\text{CH}_{\text{Ar}}\text{C}_{\text{Ar}}\text{CH}_2$ ), 110.6 ( $\text{CH}_{\text{Ar}}\text{C}_{\text{Ar}}\text{CH}_2'$ ), 104.5 ( $\text{C}_{\text{Ar}}\text{COOCH}_3$ ), 98.9 ( $\text{CH}_{\text{Ar}}\text{COH}$ ), 98.8 ( $\text{CH}_{\text{Ar}}\text{COH}'$ ), 70.8 ( $\text{CHOTBDPS}$ ), 70.5 ( $\text{CHOTBDPS}'$ ), 68.1 (CHOTES), 66.4 ( $\text{CHOTBS}$ ), 66.3 ( $\text{CHOTBS}'$ ), 55.2 ( $\text{C}_{\text{Ar}}\text{OCH}_3$ ), 51.8 ( $\text{COOCH}_3$ ), 45.9 ( $\text{CH}_2\text{CHOTBS}$ ), 44.9 ( $\text{CH}_2\text{CHOTBS}'$ ), 37.9 ( $\text{CH}_2\text{CHCH}_3$ ), 37.6 ( $\text{CH}_2\text{CHOTBDPS}$ ), 36.8 ( $\text{C}_{\text{Ar}}\text{CH}_2$ ), 36.7 ( $\text{C}_{\text{Ar}}\text{CH}_2'$ ), 35.7 ( $\text{CH}_2\text{CHOTBDPS}'$ ), 27.1 ( $\text{Ph}_2\text{SiC}(\text{CH}_3)_3$ ), 26.9 ( $\text{CH}_2\text{CH}_2\text{CHOTBDPS}$ ), 26.8 ( $\text{CH}_2\text{CH}_2\text{CHOTBDPS}'$ ), 25.9 ( $(\text{CH}_3)_2\text{SiC}(\text{CH}_3)_3$ ), 25.7 ( $(\text{CH}_3)_2\text{SiC}(\text{CH}_3)_3'$ ), 23.8 ( $\text{CHCH}_3$ ), 23.2 ( $\text{CHCH}_3'$ ), 19.4 ( $\text{Ph}_2\text{SiC}(\text{CH}_3)_3$ ), 19.3 ( $\text{Ph}_2\text{SiC}(\text{CH}_3)_3'$ ), 18.0 ( $(\text{CH}_3)_2\text{SiC}(\text{CH}_3)_3$ ), 17.9 ( $(\text{CH}_3)_2\text{SiC}(\text{CH}_3)_3'$ ), 6.9 ( $\text{Si}(\text{CH}_2\text{CH}_3)_3$ ), 4.9 ( $\text{Si}(\text{CH}_2\text{CH}_3)_3$ ), -3.8 ( $(\text{CH}_3)_2\text{SiC}(\text{CH}_3)_3$ ), -4.1 ( $(\text{CH}_3)_2\text{SiC}(\text{CH}_3)_3'$ ), -4.7 ( $(\text{CH}_3)_2\text{SiC}(\text{CH}_3)_3''$ ), -5.0 ( $(\text{CH}_3)_2\text{SiC}(\text{CH}_3)_3'''$ ).

**IR** (neat,  $\text{v}/\text{cm}^{-1}$ ): 3071w, 3049w, 3014w, 2954m, 2933m, 2878w, 2857w, 1653m, 1615m, 1577m, 1462w, 1429m, 1376w, 1326m, 1305w, 1255s, 1204m, 1158m, 1108m, 1081s, 1004m, 958w, 834m, 755s, 734s, 701s, 610m, 509m, 487m.

**HRMS (ESI)**:  $m/z$  calcd for  $\text{C}_{48}\text{H}_{76}\text{NaO}_7\text{Si}_3$  [ $\text{M} + \text{Na}$ ] $^+$ : 874.4791, found: 871.4797.

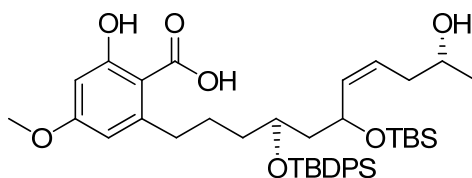

**15**

**Seco acid 15**: To a solution of **14** (80.1 mg, 94.3  $\mu\text{mol}$ , 1.0 equiv) in MeOH (4.2 mL) was added 1 M NaOH (1.4 mL, 1400  $\mu\text{mol}$ , 15 equiv) and the reaction mixture was refluxed at 87  $^\circ\text{C}$  for 21 h. It was then diluted with 0.2 M  $\text{NaH}_2\text{PO}_4$  solution and EtOAc (5 mL), the pH was adjusted to 5 through addition of solid  $\text{NaH}_2\text{PO}_4$ , and the phases were separated. The aqueous solution was extracted with EtOAc (3 x 15 mL), the combined organic extracts were washed with brine, dried over  $\text{MgSO}_4$ , and the solvent was removed under reduced pressure. The residue was purified by FC (hexane/EtOAc 5:1  $\rightarrow$  3:1  $\rightarrow$  2:1, then DCM/MeOH, 100:1  $\rightarrow$  50:1  $\rightarrow$  30:1  $\rightarrow$  10:1  $\rightarrow$  5:1) to give **15** (40.5 mg, 60%) as a yellowish solid.

$R_f = 0.42$  (DCM/MeOH 10:1).

**m.p.** 108-110  $^\circ\text{C}$ .

**<sup>1</sup>H-NMR** (400.1 MHz, DMSO-*d*<sub>6</sub>): δ 7.64-7.54 (m, 8H, Ph-*o*-CH), 7.47-7.33 (m, 12H, Ph-*m*-CH and Ph-*p*-CH), 6.17 (t, *J* = 2.4 Hz, 2H, CH<sub>Ar</sub>COH), 6.00 (d, *J* = 2.5 Hz, 1H, CH<sub>Ar</sub>COCH<sub>3</sub>), 5.93 (d, *J* = 2.5 Hz, 1H, CH<sub>Ar</sub>COCH<sub>3</sub>'), 5.31 (m<sub>c</sub>, 2H, CH=CHCH<sub>2</sub>), 5.17 (m<sub>c</sub>, 2H, CH=CHCH<sub>2</sub>'), 4.51 (dt, *J* = 4.6, 8.5 Hz, 1H, CHOTBS), 4.34 (dt, *J* = 3.8, 8.8 Hz, 1H, CHOTBS'), 3.95 (m<sub>c</sub>, 1H, CHOTBDPS), 3.83 (m<sub>c</sub>, 1H, CHOTBDPS'), 3.67 (d, *J* = 4.0 Hz, 6H, C<sub>Ar</sub>OCH<sub>3</sub>), 3.59 (tdd, *J* = 6.2, 12.3 Hz, 2H, CHCH<sub>3</sub>), 2.94-2.82 (m, 1H, CHHCH<sub>2</sub>CHOTBDPS), 2.80-2.59 (m, 3H, CHHCH<sub>2</sub>CHOTBDPS and CH<sub>2</sub>CH<sub>2</sub>CHOTBDPS), 2.12-1.94 (m, 4H, CH<sub>2</sub>CHOH), 1.71-1.31 (m, 12H, C<sub>Ar</sub>CH<sub>2</sub>, CH<sub>2</sub>CHOTBDPS and CH<sub>2</sub>CHOTBS), 1.22 (br s, 2H, OH), 1.00-0.96 (m, 6H, CHCH<sub>3</sub>), 0.98 (s, 18H, Ph<sub>2</sub>SiC(CH<sub>3</sub>)<sub>3</sub>), 0.72 (d, *J* = 20.9 Hz, 18H, (CH<sub>3</sub>)<sub>2</sub>SiC(CH<sub>3</sub>)<sub>3</sub>), -0.12 (dd, *J* = 12.6, 13.3 Hz, 12H, (CH<sub>3</sub>)<sub>2</sub>SiC(CH<sub>3</sub>)<sub>3</sub>).

**<sup>13</sup>C-NMR** (100.6 MHz, DMSO-*d*<sub>6</sub>): δ 173.1 (C=O), 172.9 (C=O'), 164.9 (C<sub>Ar</sub>OH), 164.8 (C<sub>Ar</sub>OH'), 161.5 (C<sub>Ar</sub>OCH<sub>3</sub>), 161.4 (C<sub>Ar</sub>OCH<sub>3</sub>'), 146.6 (C<sub>Ar</sub>CH<sub>2</sub>), 146.5 (C<sub>Ar</sub>CH<sub>2</sub>'), 135.2 (Ph-*o*-C), 134.4 (CH=CHCH<sub>2</sub>), 134.3 (CH=CHCH<sub>2</sub>'), 134.0 (Ph-*i*-C), 133.9 (Ph-*i*-C'), 133.8 (Ph-*i*-C''), 133.7 (Ph-*i*-C'''), 129.6 (Ph-*p*-C), 129.5 (Ph-*p*-C'), 127.5 (Ph-*m*-C), 125.9 (CH=CHCH<sub>2</sub>), 125.7 (CH=CHCH<sub>2</sub>'), 108.7 (C<sub>Ar</sub>COOH), 108.4 (C<sub>Ar</sub>COOH'), 107.4 (CH<sub>Ar</sub>C<sub>Ar</sub>CH<sub>2</sub>), 98.5 (CH<sub>Ar</sub>COH), 70.5 (CHOTBDPS), 69.9 (CHOTBDPS'), 65.8 (CHOTBS and CHCH<sub>3</sub>), 65.7 (CHOTBS and CHCH<sub>3</sub>'), 65.6 (CHOTBS and CHCH<sub>3</sub>'), 54.7 (C<sub>Ar</sub>OCH<sub>3</sub>), 45.6 (CH<sub>2</sub>CHOTBS), 44.1 (CH<sub>2</sub>CHOTBS'), 37.1 (CH<sub>2</sub>CHOTBDPS and CH<sub>2</sub>CHOH), 37.0 (CH<sub>2</sub>CHOTBDPS and CH<sub>2</sub>CHOH), 35.1 (C<sub>Ar</sub>CH<sub>2</sub> and CH<sub>2</sub>CH<sub>2</sub>CHOTBDPS), 34.8 (C<sub>Ar</sub>CH<sub>2</sub> and CH<sub>2</sub>CH<sub>2</sub>CHOTBDPS), 34.6 (C<sub>Ar</sub>CH<sub>2</sub> and CH<sub>2</sub>CH<sub>2</sub>CHOTBDPS), 26.8 (Ph<sub>2</sub>SiC(CH<sub>3</sub>)<sub>3</sub>), 26.7 (Ph<sub>2</sub>SiC(CH<sub>3</sub>)<sub>3</sub>'), 25.6 ((CH<sub>3</sub>)<sub>2</sub>SiC(CH<sub>3</sub>)<sub>3</sub>), 25.5 ((CH<sub>3</sub>)<sub>2</sub>SiC(CH<sub>3</sub>)<sub>3</sub>'), 23.2 (CH<sub>3</sub>), 23.0 (CH<sub>3</sub>'), 18.8 (Ph<sub>2</sub>SiC(CH<sub>3</sub>)<sub>3</sub>), 17.5 ((CH<sub>3</sub>)<sub>2</sub>SiC(CH<sub>3</sub>)<sub>3</sub>), -4.0 ((CH<sub>3</sub>)<sub>2</sub>SiC(CH<sub>3</sub>)<sub>3</sub>), -4.2 ((CH<sub>3</sub>)<sub>2</sub>SiC(CH<sub>3</sub>)<sub>3</sub>'), -5.0 ((CH<sub>3</sub>)<sub>2</sub>SiC(CH<sub>3</sub>)<sub>3</sub>'), -5.3 ((CH<sub>3</sub>)<sub>2</sub>SiC(CH<sub>3</sub>)<sub>3</sub>''').

**IR** (neat, ν/cm<sup>-1</sup>): 3415w, 3071w, 3049w, 3012w, 2929m, 2856m, 1584m, 1462w, 1428m, 1372m, 1253m, 1202m, 1159m, 1106s, 1079s, 1005m, 939w, 834s, 775s, 739m, 701s, 612m, 509m, 485m.

**HRMS (ESI)**: *m/z* calcd for C<sub>41</sub>H<sub>60</sub>NaO<sub>7</sub>Si<sub>2</sub> [M + Na]<sup>+</sup>: 743.3770, found: 743.3767.

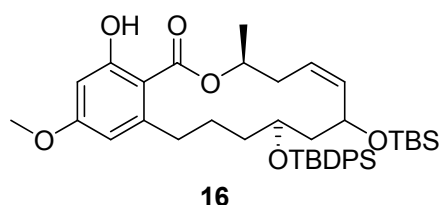

**Protected macrolactone 16**: To a solution of Ph<sub>3</sub>P (1.67 g, 6.37 mmol, 12.0 equiv) in 128 mL toluene was added DEAD (1.00 mL, 6.37 mmol, 12.0 equiv) dropwise at rt. The solution was stirred at rt for 40 min. To this solution was added a solution of **15** (383 mg, 531 μmol, 1.0 equiv) in toluene (168 mL + 10 mL washing) at 0 °C over a period of 1.5 h. The resulting mixture was stirred for 1 h at 0 °C and then allowed to warm to rt over 1.5 h. After quenching with water (170 mL) the aqueous layer was extracted with EtOAc (3 x 150 mL). The combined organic extracts were washed with

brine, dried over  $\text{MgSO}_4$ , filtered and the solvent was removed under reduced pressure. The residue was purified by FC (hexane/ $\text{Et}_2\text{O}$  100:1  $\rightarrow$  20:1, then hexane/ $\text{EtOAc}$  10:1) to give **16** as a colorless oil (181.2 mg, 49%).

$R_f$  = 0.23 (hexane/  $\text{Et}_2\text{O}$  10:1).

**$^1\text{H-NMR}$**  (400.1 MHz,  $\text{CDCl}_3$ ):  $\delta$  12.09 (s, 1H, -OH), 11.76 (s, 1H, -OH'), 7.69-7.60 (m, 8H, Ph-*o*-CH), 7.42-7.25 (m, 12H, Ph-*m*-CH and Ph-*p*-CH), 6.32 (d,  $J$  = 2.6, 1H,  $\text{CH}_{\text{Ar}}\text{COH}$ ), 6.16 (d,  $J$  = 2.6 Hz, 1H,  $\text{CH}_{\text{Ar}}\text{COCH}_3$ ), 6.10 (d,  $J$  = 2.6 Hz, 1H,  $\text{CH}_{\text{Ar}}\text{COCH}_3'$ ), 5.47-5.38 (m, 1H,  $\text{CH}=\text{CHCH}$ ), 5.35-5.14 (m, 4H,  $\text{CHCH}_3$ ,  $\text{CH}=\text{CHCH}'$ ,  $\text{CH}=\text{CHCH}$ ), 5.10-5.02 (m, 1H,  $\text{CH}=\text{CHCH}'$ ), 4.47-4.38 (m, 1H,  $\text{CHOTBS}$ ), 4.33-4.25 (m, 1H,  $\text{CHOTBS}'$ ), 3.78 (d,  $J$  = 3.5 Hz, 6H,  $\text{C}_{\text{Ar}}\text{OCH}_3$ ), 3.70-3.63 (m, 1H,  $\text{CHOTBDPS}$ ), 3.58-3.50 (m, 1H,  $\text{CHOTBDPS}'$ ), 2.79-2.60 (m, 4H,  $\text{C}_{\text{Ar}}\text{CHH}$ ,  $\text{C}_{\text{Ar}}\text{CHH}'$ ,  $\text{CHHCH}=\text{CH}$  and  $\text{CHHCH}=\text{CH}'$ ), 2.42-2.16 (m, 4H,  $\text{C}_{\text{Ar}}\text{CHH}$ ,  $\text{C}_{\text{Ar}}\text{CHH}'$ ,  $\text{CHHCH}=\text{CH}$  and  $\text{CHHCH}=\text{CH}'$ ), 2.03-1.82 (m, 3H,  $\text{CH}_2\text{CHOTBS}$  and  $\text{CHHCHOTBS}'$ ), 1.78-1.54 (m, 5H,  $\text{CHHCHOTBS}'$ ,  $\text{CHHCH}_2\text{CHOTBDPS}$ ,  $\text{CH}_2\text{CHOTBDPS}$  and  $\text{CHHCHOTBDPS}'$ ), 1.45-1.28 (m, 4H,  $\text{CHHCHOTBDPS}'$ ,  $\text{CHHCH}_2\text{CHOTBDPS}$  and  $\text{CH}_2\text{CH}_2\text{CHOTBDPS}'$ ), 1.38 (s,  $J$  = 6.2 Hz, 6H,  $\text{CHCH}_3$ ), 1.05 (d,  $J$  = 3.0 Hz, 18H,  $\text{Ph}_2\text{SiC}(\text{CH}_3)_3$ ), 0.84 (d,  $J$  = 5.9 Hz, 18H,  $(\text{CH}_3)_2\text{SiC}(\text{CH}_3)_3'$ ), 0.03 (d,  $J$  = 11.6 Hz, 6H,  $(\text{CH}_3)_2\text{SiC}(\text{CH}_3)_3$ ), -0.04 (d,  $J$  = 7.4 Hz, 6H,  $(\text{CH}_3)_2\text{SiC}(\text{CH}_3)_3'$ ).

**$^{13}\text{C-NMR}$**  (100.6 MHz,  $\text{CDCl}_3$ ):  $\delta$  171.6 (C=O), 165.9 ( $\text{C}_{\text{Ar}}\text{OH}$ ), 165.0 ( $\text{C}_{\text{Ar}}\text{OH}'$ ), 164.0 ( $\text{C}_{\text{Ar}}\text{OCH}_3$ ), 163.8 ( $\text{C}_{\text{Ar}}\text{OCH}_3'$ ), 147.8 ( $\text{C}_{\text{Ar}}\text{CH}_2$ ), 135.9 (Ph-*o*-C), 135.2 ( $\text{CH}=\text{CHCHOTBS}$ ), 134.6 ( $\text{CH}=\text{CHCHOTBS}'$ ), 134.3 (Ph-*i*-C), 134.2 (Ph-*i*-C'), 134.1 (Ph-*i*-C''), 129.6 (Ph-*p*-C), 129.5 (Ph-*p*-C'), 129.4 (Ph-*p*-C''), 127.5 (Ph-*m*-C), 127.4 (Ph-*m*-C'), 126.7 ( $\text{CH}=\text{CHCHOTBS}$ ), 126.2 ( $\text{CH}=\text{CHCHOTBS}'$ ), 109.1 ( $\text{CH}_{\text{Ar}}\text{C}_{\text{Ar}}\text{CH}_2$ ), 108.8 ( $\text{CH}_{\text{Ar}}\text{C}_{\text{Ar}}\text{CH}_2'$ ), 105.7 ( $\text{C}_{\text{Ar}}\text{COOCH}$ ), 104.8 ( $\text{C}_{\text{Ar}}\text{COOCH}'$ ), 98.7 ( $\text{CH}_{\text{Ar}}\text{COH}$ ), 98.6 ( $\text{CH}_{\text{Ar}}\text{COH}'$ ), 72.7 ( $\text{CHCH}_3$ ), 72.6 ( $\text{CHCH}_3'$ ), 71.0 ( $\text{CHOTBDPS}$ ), 69.9 ( $\text{CHOTBDPS}'$ ), 67.0 ( $\text{CHOTBS}$ ), 65.1 ( $\text{CHOTBS}'$ ), 55.2 ( $\text{C}_{\text{Ar}}\text{OCH}_3$ ), 45.7 ( $\text{CH}_2\text{CHOTBS}$ ), 45.3 ( $\text{CH}_2\text{CHOTBS}'$ ), 36.8 ( $\text{CH}_2\text{CHOTBDPS}$ ), 36.2 ( $\text{C}_{\text{Ar}}\text{CH}_2$ ), 35.0 ( $\text{CH}_2\text{CH}=\text{CH}$ ), 34.5 ( $\text{CH}_2\text{CH}=\text{CH}'$ ), 34.2 ( $\text{C}_{\text{Ar}}\text{CH}_2'$ ), 27.7 ( $\text{CH}_2\text{CH}_2\text{CHOTBDPS}'$ ), 27.1 ( $\text{Ph}_2\text{SiC}(\text{CH}_3)_3$ ), 25.8 ( $(\text{CH}_3)_2\text{SiC}(\text{CH}_3)_3$ ), 21.1 ( $\text{CHCH}_3$ ), 19.3 ( $\text{CHCH}_3'$  and  $\text{Ph}_2\text{SiC}(\text{CH}_3)_3$ ), 18.1 ( $(\text{CH}_3)_2\text{SiC}(\text{CH}_3)_3$ ), 18.0 ( $(\text{CH}_3)_2\text{SiC}(\text{CH}_3)_3'$ ), -4.1 ( $(\text{CH}_3)_2\text{SiC}(\text{CH}_3)_3$ ), -4.4 ( $(\text{CH}_3)_2\text{SiC}(\text{CH}_3)_3'$ ), -4.6 ( $(\text{CH}_3)_2\text{SiC}(\text{CH}_3)_3''$ ), -4.9 ( $(\text{CH}_3)_2\text{SiC}(\text{CH}_3)_3'''$ ).

**IR** (neat,  $\text{v}/\text{cm}^{-1}$ ) : 2957m, 2927s, 2858m, 1726s, 1644w, 1614w, 1579w, 1462m, 1380w, 1269s, 1159w, 1120s, 1071s, 1040m, 962m, 834w, 774m, 741s, 703s, 651w, 611w, 510w.

**HRMS (ESI)**:  $m/z$  calcd for  $\text{C}_{41}\text{H}_{58}\text{NaO}_6\text{Si}_2$  [ $\text{M} + \text{Na}$ ] $^+$ : 725.3664, found: 725.3665.

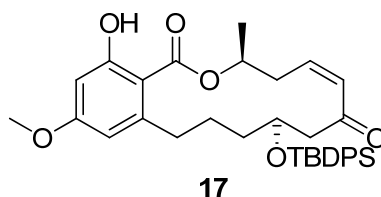

**Enone 17:** *Jones* reagent (8 N) was prepared by dissolving pure chromium trioxide (266.8 mg) in distilled water, adding conc. H<sub>2</sub>SO<sub>4</sub> (0.213 mL) and then diluting the mixture with water to 1 mL.

To a solution of **16** (83 mg, 118 μmol, 1.0 equiv) in 2.2 mL acetone at –15 °C were added KF (15.7 mg, 270 μmol, 2.3 equiv) and freshly prepared 8 N *Jones* reagent (177 μL; CrO<sub>3</sub>: 473 μmol, 4.0 equiv; H<sub>2</sub>SO<sub>4</sub>: 708 mmol, 6.0 equiv). The reaction mixture was stirred at –10 °C for 2 h and diluted with water (15 mL). The aqueous layer was extracted with CH<sub>2</sub>Cl<sub>2</sub> (3 x 30 mL) and the combined organic extracts were washed with brine, dried over MgSO<sub>4</sub>, filtered and the solvent was removed under reduced pressure. The residue was purified FC (hexane/EtOAc 50:1 → 20:1 → 15:1 → 10:1 → 8:1) to give **17** as a white foam (44.0 mg, 64%).

R<sub>f</sub> = 0.25 (hexane/EtOAc 8:1).

[α]<sub>D</sub><sup>24</sup> = +46.5° (c = 0.882, CHCl<sub>3</sub>).

**<sup>1</sup>H-NMR** (400.1 MHz, C<sub>6</sub>D<sub>6</sub>): δ 12.75 (s, 1H, -OH), 7.75-7.69 (m, 4H, Ph-*o*-CH), 7.23-7.13 (m, 6H, Ph-*m*-CH and Ph-*p*-CH), 6.44 (d, *J* = 2.6, 1H, CH<sub>Ar</sub>COH), 6.25 (d, *J* = 2.6 Hz, 1H, CH<sub>Ar</sub>COCH<sub>3</sub>), 5.45 (dd, *J* = 2.3, 11.5 Hz, 1H, CH=CHCCH<sub>2</sub>), 5.24 (dt, *J* = 3.2, 11.1 Hz, 1H, CH=CHCCH<sub>2</sub>), 4.95 (m<sub>c</sub>, 1H, CHCH<sub>3</sub>), 3.98 (m<sub>c</sub>, 1H, CHOTBDPS), 3.24-3.12 (m, 1H, CHHCH=CH), 3.18 (s, 3H, C<sub>Ar</sub>OCH<sub>3</sub>), 2.79 (m<sub>c</sub>, 1H, C<sub>Ar</sub>CHH), 2.61-2.51 (m, 2H, CH<sub>2</sub>CCH), 2.28 (ddd, *J* = 5.7, 11.0, 14.6 Hz, 1H, C<sub>Ar</sub>CHH), 1.93 (ddd, *J* = 3.0, 5.2, 16.9 Hz, 1H, CHHCH=CH), 1.85 (m<sub>c</sub>, 1H, CHHCHOTBDPS), 1.63-1.52 (m, 1H, CHHCHOTBDPS), 1.52-1.29 (m, 2H, CH<sub>2</sub>CH<sub>2</sub>CHOTBDPS), 1.16 (s, 9H, Ph<sub>2</sub>SiC(CH<sub>3</sub>)<sub>3</sub>), 0.90 (d, *J* = 6.2 Hz, 3H, CHCH<sub>3</sub>).

**<sup>13</sup>C-NMR** (100.6 MHz, C<sub>6</sub>D<sub>6</sub>): δ 198.8 (CHC=O), 171.9 (C=O), 167.4 (C<sub>Ar</sub>OH), 164.7 (C<sub>Ar</sub>OCH<sub>3</sub>), 147.5 (C<sub>Ar</sub>CH<sub>2</sub>), 141.2 (CH=CHCCH<sub>2</sub>), 136.2 (Ph-*o*-C), 134.4 (Ph-*i*-C), 134.0 (Ph-*i*-C'), 130.6 (CH=CHCCH<sub>2</sub>), 130.1 (Ph-*p*-C), 128.0 (Ph-*m*-C), 110.1 (CH<sub>Ar</sub>C<sub>Ar</sub>CH<sub>2</sub>), 105.0 (C<sub>Ar</sub>COOCH), 99.2 (CH<sub>Ar</sub>COH), 73.0 (CHCH<sub>3</sub>), 71.2 (CHOTBDPS), 54.7 (C<sub>Ar</sub>OCH<sub>3</sub>), 52.8 (CH<sub>2</sub>CCH), 37.3 (CH<sub>2</sub>CHOTBDPS), 36.3 (CH<sub>2</sub>), 36.2 (CH<sub>2</sub>), 27.8 (CH<sub>2</sub>CH<sub>2</sub>CHOTBDPS), 27.1 (Ph<sub>2</sub>SiC(CH<sub>3</sub>)<sub>3</sub>), 20.2 (CHCH<sub>3</sub>), 19.4 (Ph<sub>2</sub>SiC(CH<sub>3</sub>)<sub>3</sub>).

**IR** (neat, ν/cm<sup>-1</sup>): 3070w, 2932m, 2857w, 1690m, 1640m, 1612s, 1577m, 1463w, 1427m, 1379w, 1351m, 1305m, 1251s, 1215m, 1159s, 1106s, 1047s, 1004m, 957w, 823m, 755s, 701s, 612m, 509s, 488m.

**HRMS (ESI):** *m/z* calcd for C<sub>35</sub>H<sub>46</sub>NO<sub>6</sub>Si [M + NH<sub>4</sub>]<sup>+</sup>: 604.3089, found: 604.3088.

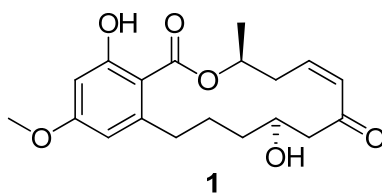

**5'-Deoxy L-783277 (1):** To a solution of **17** (64.4 mg, 0.11 mmol, 1.0 equiv) in 4.9 mL THF was added HF•pyridine (1.23 mL, 47.4 mmol, 431 equiv) at  $-10\text{ }^{\circ}\text{C}$ . The reaction mixture was stirred at rt for 9 h; it was then added to a mixture of sat.  $\text{NaHCO}_3$  (150 mL) and EtOAc (100 mL) under vigorous stirring. The phases were separated and the aqueous layer was extracted with EtOAc (3 x 100 mL). The combined organic extracts were washed with sat.  $\text{CuSO}_4$  (2 x 50 mL) and brine (70 mL), dried over  $\text{MgSO}_4$ , filtered and the solvent was removed under reduced pressure. The residue was purified by FC (hexane/EtOAc 5:1  $\rightarrow$  3:1  $\rightarrow$  1:1  $\rightarrow$  1:2) to give **1** as a white solid (33.7 mg, 88%). HPLC purity >95% (Waters Symmetry  $\text{C}_{18}$  column, 3.5  $\mu\text{m}$ , 4.6x100 mm, rt, 1.0 mL/min, 10  $\mu\text{L}$  injected:  $\text{H}_2\text{O}/\text{MeCN}$  80/20  $\rightarrow$  50/50 in 5 min,  $\rightarrow$  30/70 in 5 min,  $\rightarrow$  10/90 in 5 min, 10:90, 5 min), detection at  $\lambda = 254\text{ nm}$ ,  $t_R = 8.6\text{ min}$ ).

$R_f = 0.64$  (EtOAc).

**m.p.** 115-116  $^{\circ}\text{C}$ .

$[\alpha]_D^{24} = -46.4^{\circ}$  ( $c = 0.822$ ,  $\text{CHCl}_3$ ).

**$^1\text{H-NMR}$**  (400.1 MHz,  $\text{C}_6\text{D}_6$ ):  $\delta$  12.75 (s, 1H, -OH), 6.47 (d,  $J = 2.7$ , 1H,  $\text{CH}_{\text{Ar}}\text{COH}$ ), 6.30 (d,  $J = 2.6\text{ Hz}$ , 1H,  $\text{CH}_{\text{Ar}}\text{COCH}_3$ ), 5.55 (dd,  $J = 3.0, 11.6\text{ Hz}$ , 1H,  $\text{CH}=\text{CHCCH}_2$ ), 5.27 (dt,  $J = 2.8, 11.6\text{ Hz}$ , 1H,  $\text{CH}=\text{CHCCH}_2$ ), 5.13 (m, 1H,  $\text{CHCH}_3$ ), 3.66 (m, 1H,  $\text{CHOH}$ ), 3.33 (d,  $J = 10.4\text{ Hz}$ , 1H, OH), 3.16 (s, 3H,  $\text{C}_{\text{Ar}}\text{OCH}_3$ ), 3.14-2.97 (m, 2H,  $\text{CHHCH}=\text{CH}$  and  $\text{C}_{\text{Ar}}\text{CHH}$ ), 2.29-2.09 (m, 3H,  $\text{CH}_2\text{CCH}$  and  $\text{C}_{\text{Ar}}\text{CHH}$ ), 1.85-1.66 (m, 2H,  $\text{CHHCH}=\text{CH}$  and  $\text{CHHCOH}$ ), 1.56-1.44 (m, 1H,  $\text{CHHCOH}$ ), 1.33-1.20 (m, 1H,  $\text{CHHCH}_2\text{CH}$ ), 1.15-1.01 (m, 1H,  $\text{CHHCH}_2\text{CH}$ ), 0.88 (d,  $J = 6.2\text{ Hz}$ , 3H,  $\text{CHCH}_3$ ).

**$^{13}\text{C-NMR}$**  (100.6 MHz,  $\text{C}_6\text{D}_6$ ):  $\delta$  204.8 ( $\text{CHC}=\text{O}$ ), 171.9 ( $\text{C}=\text{O}$ ), 167.4 ( $\text{C}_{\text{Ar}}\text{OH}$ ), 164.7 ( $\text{C}_{\text{Ar}}\text{OCH}_3$ ), 147.7 ( $\text{C}_{\text{Ar}}\text{CH}_2$ ), 139.1 ( $\text{CH}=\text{CHCCH}_2$ ), 132.4 ( $\text{CH}=\text{CHCCH}_2$ ), 111.2 ( $\text{CH}_{\text{Ar}}\text{C}_{\text{Ar}}\text{CH}_2$ ), 104.9 ( $\text{C}_{\text{Ar}}\text{COOCH}$ ), 99.4 ( $\text{CH}_{\text{Ar}}\text{COH}$ ), 72.2 ( $\text{CHCH}_3$ ), 70.4 ( $\text{CHOH}$ ), 54.8 ( $\text{C}_{\text{Ar}}\text{OCH}_3$ ), 45.7 ( $\text{CH}_2\text{CCH}$ ), 37.3 ( $\text{C}_{\text{Ar}}\text{CH}_2$ ), 37.2 ( $\text{CH}_2\text{CHOH}$ ), 36.3 ( $\text{CH}_2\text{CH}=\text{CH}$ ), 29.5 ( $\text{CH}_2\text{CH}_2\text{CHOH}$ ), 20.6 ( $\text{CHCH}_3$ ).

**IR** (neat,  $\text{v}/\text{cm}^{-1}$ ): 3505w, 2931w, 2859w, 1684w, 1639s, 1611s, 1576m, 1421w, 1380w, 1350m, 1304m, 1250s, 1203s, 1159s, 1138m, 1101m, 1045s, 1016m, 957w, 828m, 750s, 714m, 622w, 601w, 539w.

**HRMS (ESI):**  $m/z$  calcd for  $\text{C}_{19}\text{H}_{25}\text{O}_6$   $[\text{M} + \text{H}]^+$ : 349.1646, found: 349.1638.

### 3. Synthesis of *E*-5-deoxy L-783277 (**2**)

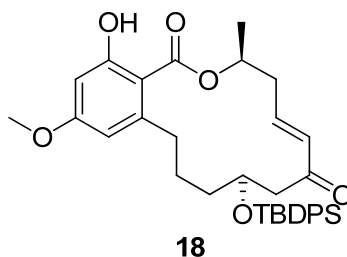

***E*-Enone 18:** **17** (12.6 mg, 21.5  $\mu$ mol, 1.0 equiv) was dissolved in  $\text{CDCl}_3$  (0.7 mL). The progress of the isomerization was followed by  $^1\text{H}$ -NMR. After 4 days (96% conversion), the solvent was removed under reduced pressure and the residue was purified by FC (hexane/EtOAc 50:1  $\rightarrow$  20:1  $\rightarrow$  15:1  $\rightarrow$  10:1  $\rightarrow$  8:1) to give **18** as a colorless oil (10.4 mg, 83%).

$R_f$  = 0.13 (hexane/EtOAc, 8:1).

$[\alpha]_D^{24} = -13.7^\circ$  ( $c$  = 0.520,  $\text{CHCl}_3$ ).

**$^1\text{H}$ -NMR** (400.1 MHz,  $\text{CDCl}_3$ ):  $\delta$  11.64 (s, 1H, -OH), 7.71-7.65 (m, 4H, Ph-*o*-CH), 7.45-7.32 (m, 6H, Ph-*m*-CH and Ph-*p*-CH), 6.74 (dd,  $J$  = 6.2, 8.5, 15.8 Hz, 1H,  $\text{CH}=\text{CHCCH}_2$ ), 6.32 (d,  $J$  = 2.6, 1H,  $\text{CH}_{\text{Ar}}\text{COH}$ ), 6.16 (d,  $J$  = 2.7 Hz, 1H,  $\text{CH}_{\text{Ar}}\text{COCH}_3$ ), 5.98 (d,  $J$  = 16.0 Hz, 1H,  $\text{CH}=\text{CHCCH}_2$ ), 5.47 (m, 1H,  $\text{CHCH}_3$ ), 4.02-3.93 (m, 1H, CHOTBDPS), 3.79 (s, 3H,  $\text{C}_{\text{Ar}}\text{OCH}_3$ ), 2.83-2.68 (m, 3H,  $\text{C}_{\text{Ar}}\text{CHH}$ ,  $\text{CHHCCH}$  and  $\text{CHHCH}=\text{CH}$ ), 2.64 (dd,  $J$  = 3.8, 12.0 Hz, 1H,  $\text{CHHCCH}$ ), 2.50-2.32 (m, 2H,  $\text{C}_{\text{Ar}}\text{CHH}$  and  $\text{CHHCH}=\text{CH}$ ), 1.65-1.44 (m, 3H,  $\text{CH}_2\text{CHOTBDPS}$  and  $\text{CHHCH}_2\text{CHOTBDPS}$ ), 1.46 (d,  $J$  = 6.5 Hz, 1H,  $\text{CHCH}_3$ ), 1.37-1.24 (m, 1H,  $\text{CHHCH}_2\text{CHOTBDPS}$ ), 1.08 (s, 9H,  $\text{Ph}_2\text{SiC}(\text{CH}_3)_3$ ).

**$^{13}\text{C}$ -NMR** (100.6 MHz,  $\text{CDCl}_3$ ):  $\delta$  198.6 ( $\text{CHC}=\text{O}$ ), 170.5 ( $\text{C}=\text{O}$ ), 165.6 ( $\text{C}_{\text{Ar}}\text{OH}$ ), 164.1 ( $\text{C}_{\text{Ar}}\text{OCH}_3$ ), 147.3 ( $\text{C}_{\text{Ar}}\text{CH}_2$ ), 141.0 ( $\text{CH}=\text{CHCCH}_2$ ), 135.9 (Ph-*o*-C), 135.6 ( $\text{CH}=\text{CHCCH}_2$ ), 134.0 (Ph-*i*-C), 133.9 (Ph-*i*-C'), 129.7 (Ph-*p*-C), 127.6 (Ph-*m*-C), 110.0 ( $\text{CH}_{\text{Ar}}\text{C}_{\text{Ar}}\text{CH}_2$ ), 104.6 ( $\text{C}_{\text{Ar}}\text{COOCH}$ ), 99.0 ( $\text{CH}_{\text{Ar}}\text{COH}$ ), 70.8 (CHOTBDPS), 70.6 ( $\text{CHCH}_3$ ), 55.3 ( $\text{C}_{\text{Ar}}\text{OCH}_3$ ), 46.7 ( $\text{CH}_2\text{CCH}$ ), 37.4 ( $\text{CH}_2\text{CH}=\text{CH}$ ), 37.1 ( $\text{CH}_2\text{CHOTBDPS}$ ), 35.8 ( $\text{C}_{\text{Ar}}\text{CH}_2$ ), 27.1 ( $\text{CH}_2\text{CH}_2\text{CHOTBDPS}$ ), 27.0 ( $\text{Ph}_2\text{SiC}(\text{CH}_3)_3$ ), 19.3 ( $\text{CHCH}_3$ ), 19.2 ( $\text{Ph}_2\text{SiC}(\text{CH}_3)_3$ ).

**IR** (neat,  $\nu/\text{cm}^{-1}$ ): 3070w, 3045w, 2933m, 2894w, 2857m, 1645s, 1614s, 1577m, 1463m, 1428m, 1387w, 1359m, 1303m, 1255s, 1205m, 1159m, 1110s, 1041m, 1007w, 981w, 823m, 759m, 740m, 704s, 611w, 506m, 460m, 429m, 409m.

**HRMS (ESI):**  $m/z$  calcd for  $\text{C}_{35}\text{H}_{42}\text{NaO}_6\text{Si}$  [ $\text{M} + \text{Na}$ ] $^+$ : 609.2643, found: 609.2642.

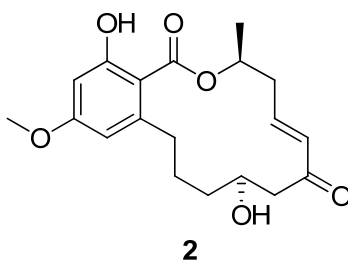

**E-5'-Deoxy L-783277 (2):** To a solution of **18** (10.4 mg, 17.7  $\mu$ mol, 1.0 equiv) in 0.8 mL THF was added HF•pyridine (0.20 mL, 7.70 mmol, 434 equiv) at  $-10^{\circ}\text{C}$ . The reaction mixture was stirred at rt for 10 h; it was then added to a mixture of sat.  $\text{NaHCO}_3$  (15 mL) and EtOAc (15 mL) under vigorous stirring, the phases were separated and the aqueous layer was extracted with EtOAc (2 x 15 mL). The combined organic extracts were washed with sat.  $\text{CuSO}_4$  (2 x 7 mL) and brine (10 mL), dried over  $\text{MgSO}_4$ , filtered and the solvent was removed under reduced pressure. The residue was purified by FC (hexane/EtOAc 10:1  $\rightarrow$  3:1  $\rightarrow$  1:1) to give **2** as a white solid (5.0 mg, 81%, 94% pure NMR and HPLC). After purification by preparative HPLC **2** was isolated as a white solid (4.06 mg, 66%). HPLC purity >99% (Waters Symmetry  $\text{C}_{18}$  column, 3.5  $\mu\text{m}$ , 4.6x100 mm, rt, 1.0 mL/min, 10  $\mu\text{L}$  injected):  $\text{H}_2\text{O}/\text{MeCN}$  80/20  $\rightarrow$  50/50 in 5 min,  $\rightarrow$  30/70 in 5 min,  $\rightarrow$  10:90 in 5 min, 10/90, 5 min, detection at  $\lambda = 254\text{ nm}$ ,  $t_{\text{R}} = 7.2\text{ min}$ ).

$R_{\text{f}} = 0.20$  (hexane/EtOAc 1:1).

**m.p.** 137-142  $^{\circ}\text{C}$ .

$[\alpha]_{\text{D}}^{24} = -90.9^{\circ}$  ( $c = 0.249$ ,  $\text{CHCl}_3$ ).

**$^1\text{H-NMR}$**  (400.1 MHz,  $\text{C}_6\text{D}_6$ ):  $\delta$  12.45 (s, 1H, -OH), 6.51 (d,  $J = 2.7$ , 1H,  $\text{CH}_{\text{Ar}}\text{COH}$ ), 6.30 (d,  $J = 2.7\text{ Hz}$ , 1H,  $\text{CH}_{\text{Ar}}\text{COCH}_3$ ), 6.24 ( $\text{m}_{\text{c}}$ , 1H,  $\text{CH}=\text{CHCCH}_2$ ), 5.84 (d,  $J = 16.2\text{ Hz}$ , 1H,  $\text{CH}=\text{CHCCH}_2$ ), 5.06 ( $\text{m}_{\text{c}}$ , 1H,  $\text{CHCH}_3$ ), 3.68 ( $\text{m}_{\text{c}}$ , 1H,  $\text{CHOH}$ ), 3.19 (s, 3H,  $\text{C}_{\text{Ar}}\text{OCH}_3$ ), 2.94 (dt,  $J = 3.8, 12.3\text{ Hz}$ , 1H,  $\text{C}_{\text{Ar}}\text{CHH}$ ), 2.63 (dd,  $J = 2.7, 12.7\text{ Hz}$ , 1H,  $\text{CHHCCH}$ ), 2.32 ( $\text{m}_{\text{c}}$ , 1H,  $\text{CHHCH}=\text{CH}$ ), 2.25-2.11 (m, 2H,  $\text{C}_{\text{Ar}}\text{CHH}$  and  $\text{CHHCCH}$ ), 1.65 ( $\text{m}_{\text{c}}$ , 1H,  $\text{CHHCOH}$ ), 1.55 ( $\text{m}_{\text{c}}$ , 1H,  $\text{CHHCH}=\text{CH}$ ), 1.27-1.00 (m, 3H,  $\text{CH}_2\text{CH}_2\text{CH}$  and  $\text{CHHCOH}$ ), 0.75 (d,  $J = 6.6\text{ Hz}$ , 3H,  $\text{CHCH}_3$ ).

**$^{13}\text{C-NMR}$**  (100.6 MHz,  $\text{C}_6\text{D}_6$ ):  $\delta$  200.8 ( $\text{CHC}=\text{O}$ ), 171.2 ( $\text{C}=\text{O}$ ), 167.1 ( $\text{C}_{\text{Ar}}\text{OH}$ ), 164.9 ( $\text{C}_{\text{Ar}}\text{OCH}_3$ ), 147.9 ( $\text{C}_{\text{Ar}}\text{CH}_2$ ), 142.4 ( $\text{CH}=\text{CHCCH}_2$ ), 137.0 ( $\text{CH}=\text{CHCCH}_2$ ), 111.6 ( $\text{CH}_{\text{Ar}}\text{C}_{\text{Ar}}\text{CH}_2$ ), 104.8 ( $\text{C}_{\text{Ar}}\text{COOCH}$ ), 99.5 ( $\text{CH}_{\text{Ar}}\text{COH}$ ), 70.6 ( $\text{CHCH}_3$ ), 70.0 ( $\text{CHOH}$ ), 54.8 ( $\text{C}_{\text{Ar}}\text{OCH}_3$ ), 41.7 ( $\text{CH}_2\text{CCH}$ ), 37.2 ( $\text{CH}_2\text{CHOH}$ ), 36.9 ( $\text{C}_{\text{Ar}}\text{CH}_2$ ), 36.2 ( $\text{CH}_2\text{CH}=\text{CH}$ ), 29.9 ( $\text{CH}_2\text{CH}_2\text{CHOH}$ ), 18.5 ( $\text{CHCH}_3$ ).

**IR** (neat,  $\text{v}/\text{cm}^{-1}$ ): 3431w, 2979m, 2937m, 2858w, 1717w, 1646s, 1614s, 1577m, 1441m, 1385m, 1353m, 1318m, 1302m, 1255s, 1204s, 1160s, 1109m, 1036m, 982m, 957w, 848w, 810w, 759m, 715w, 476w, 419w.

**HRMS (ESI):**  $m/z$  calcd for  $\text{C}_{19}\text{H}_{25}\text{O}_6$   $[\text{M} + \text{H}]^+$ : 349.1646, found: 349.1653.



#### 4. Synthesis of dideoxy L-783277 (**3**)

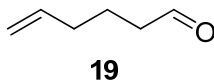

**Aldehyde 19:** To a solution of oxalylchloride (2.90 ml, 30.31 mmol, 1.5 equiv) in DCM (50 ml) was added DMSO (4.70 ml, 66.61 mmol, 3 equiv) dropwise within 5 minutes at -78 °C. The mixture was stirred at -78 °C for 10 min and a solution of 5-hexen-1-ol (2.50 ml, 20.82 mmol, 1 equiv) in DCM (7.5 ml) was added dropwise within 10 min. After stirring for 1 h at -78 °C TEA (9.20 ml, 66.19 mmol, 3 equiv) was added within 10 minutes and the reaction mixture was allowed to warm to 0 °C. Water (60 ml) and DCM (60 ml) were then added and the phases were separated. The aqueous solution was extracted with DCM (2 x 60 ml) and the combined organic extracts were dried over MgSO<sub>4</sub>, filtered and the solvent was evaporated *in vacuo* (up to 700 mbar). The crude product was purified by FC (pentane/Et<sub>2</sub>O 10:1) to give **19** (2.0 g, quant.) as a colorless oil.

**R<sub>f</sub>** = 0.53 (hexane/EtOAc 5:1); 0.44 (pentane/Et<sub>2</sub>O 10:1).

**<sup>1</sup>H-NMR** (400.1 MHz, CDCl<sub>3</sub>): δ 9.77 (t, *J* = 1.6 Hz, 1H, H-6); 5.81-5.71 (m, 2H, H-2); 5.05-4.93 (m, 2H, H-1); 2.46-2.42 (m, 2H, H-5); 2.14-2.04 (q, *J* = 7.4 Hz, 2H, H-3); 1.77-1.63 (m, 2H, H-4).

**<sup>13</sup>C-NMR** (100.6 MHz, CDCl<sub>3</sub>): δ 202.5 (C-6); 137.7 (C-2); 115.7 (C-1); 43.3 (C-5); 33.1 (C-3); 21.3 (C-4).

**IR** (neat, ν/cm<sup>-1</sup>): 3075, 2939, 2863, 1727, 1640, 1443, 1356, 1137, 993, 910.

**HRMS (EI):** *m/z* calcd for C<sub>6</sub>H<sub>10</sub>O [M-H]<sup>+</sup>: 98.0726, found: 98.0724.

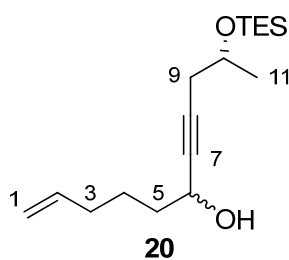

**Acetylene 20:** To a solution of **19** (100 mg, 0.50 mmol, 1 equiv) in abs. THF (5 ml) was added *n*-BuLi (1.6 M in hexane; 380 μl, 0.61 mmol, 1.2 equiv) at -10 °C and the mixture was stirred for 20 min. After cooling to -78 °C a precooled solution of **19** (60 mg, 0.61 mmol, 1.2 equiv) in abs. THF (3.5 ml) was added dropwise. The reaction mixture was stirred at -78 °C for 1.5 h and then allowed to warm to -18 °C. The reaction was quenched at this temperature by addition of sat aqu NH<sub>4</sub>Cl (10 ml). The mixture was extracted with Et<sub>2</sub>O (1 x 10 ml) and the extract was dried over MgSO<sub>4</sub>, filtered and the solvent was evaporated *in vacuo*. The crude product was purified by FC (hexane/Et<sub>2</sub>O 4:1 → 2:1) to give **20** (76 mg, 51%) as a pale yellow oil.

$R_f$  = 0.51 (hexane/Et<sub>2</sub>O 4:1).

**<sup>1</sup>H-NMR** (400.1 MHz, CDCl<sub>3</sub>):  $\delta$  0.58-0.63 (q,  $J$  = 7.9 Hz, 6H, SiCH<sub>2</sub>CH<sub>3</sub>); 0.94-0.99 (t,  $J$  = 7.9 Hz, 9H, SiCH<sub>2</sub>CH<sub>3</sub>); 1.22-1.24 (d,  $J$  = 6.0 Hz, 3H, H-11); 1.52-1.58 (m, 2H, H-4'); 1.65-1.72 (m, 2H, H-5); 2.06-2.11 (q,  $J$  = 7.6 Hz, 2H, H-3); 2.24-2.42 (m, 2H, H-9); 3.90-3.95 (m, 1H, H-10); 4.35-4.36 (m, 1H, H-6); 4.94-5.04 (m, 2H, H-1); 5.77-5.84 (m, 1H, H-2).

**<sup>13</sup>C-NMR** (100.6 MHz, CDCl<sub>3</sub>):  $\delta$  5.0 (SiCH<sub>2</sub>CH<sub>3</sub>); 7.0 (SiCH<sub>2</sub>CH<sub>3</sub>); 23.5 (C-11); 24.6 (C-4); 29.8 (C-9); 33.5 (C-3); 37.6 (C-5); 62.7 (C-6); 67.6 (C-10); 82.9 (C-7/C-8); 114.9 (C-1); 138.6 (C-2).

**IR** (neat,  $\nu/\text{cm}^{-1}$ ): 3379, 3077, 2955, 2912, 2876, 1813, 1641, 1459, 1377, 1239, 1125, 1096, 1000, 909, 724.

**HRMS (EI)**:  $m/z$  calcd for C<sub>15</sub>H<sub>27</sub>O<sub>2</sub>Si [M-C<sub>2</sub>H<sub>5</sub>]<sup>+</sup>: 267.1775, found: 267.1777.

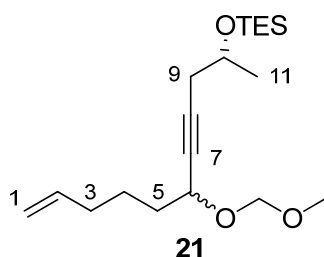

**MOM-Ether 21**: To a solution of **20** (587 mg, 1.98 mmol, 1 equiv) in DMF (60 ml) were added sequentially TBAI (3.7 mg, 0.01 mmol, 0.005 equiv), DIEA (2.76 ml, 15.85 mmol, 8 equiv) and MOM-Cl (1.20 ml, 15.85 mmol, 8 equiv) and the mixture was stirred for 17 h. EtOAc (50 ml) and diluted NaHCO<sub>3</sub> solution (50 ml) were then added to the mixture, the pH was adjusted 7 by addition of sat aqu NH<sub>4</sub>Cl and the phases were separated. The aqueous solution was extracted with EtOAc (3 x 50 ml) and the combined organic extracts were dried over MgSO<sub>4</sub>, filtered and the solvent was evaporated *in vacuo*. The crude product was purified by FC (hexane/EtOAc 20:1) to give **21** (614 mg, 91%) as a colorless oil.

$R_f$  = 0.50 (hexane/EtOAc 10:1).

**<sup>1</sup>H-NMR** (400.1 MHz, CDCl<sub>3</sub>):  $\delta$  5.84-5.76 (m, 1H, H-2); 5.04-4.97 (m, 2H, H-1); 0.60 (q,  $J$  = 8.2 Hz, 6H, SiCH<sub>2</sub>CH<sub>3</sub>); 4.75 (dd, 2H, MOM-CH<sub>2</sub>); 4.33-4.30 (m, 1H, H-6); 3.95-3.90 (m, 1H, H-10); 3.36 (s, 3H, MOM-CH<sub>3</sub>); 2.43-2.24 (m, 2H, H-9); 2.12-2.06 (q,  $J$  = 7.3 Hz, 2H, H-3); 1.75-1.68 (m, 2H, H-5); 1.61-1.54 (m, 2H, H-4); 1.23 (d,  $J$  = 6.3 Hz, 3H, H-11); 0.95 (t,  $J$  = 8.2 Hz, 9H, SiCH<sub>2</sub>CH<sub>3</sub>).

**<sup>13</sup>C-NMR** (100.6 MHz, CDCl<sub>3</sub>):  $\delta$  138.7 (C-2); 5.0 (SiCH<sub>2</sub>CH<sub>3</sub>); 114.8 (C-1); 94.0 (MOM-CH<sub>2</sub>); 83.5 (C-8); 80.3 (C-7); 67.6 (C-10); 65.8 (C-6'), 55.7 (MOM-CH<sub>3</sub>); 35.5 (C-5); 33.5 (C-3); 29.9 (C-9); 24.8 (C-4); 23.5 (C-11); 7.0 (SiCH<sub>2</sub>CH<sub>3</sub>).

**IR** (neat,  $\nu/\text{cm}^{-1}$ ): 3077, 2954, 2877, 1641, 1461, 1239, 1097, 1034, 1000, 741, 735, 725.

**HRMS (EI)**:  $m/z$  calcd for C<sub>15</sub>H<sub>27</sub>O<sub>2</sub>Si [M-C<sub>2</sub>H<sub>5</sub>]<sup>+</sup>: 311.2050, found: 311.2050.

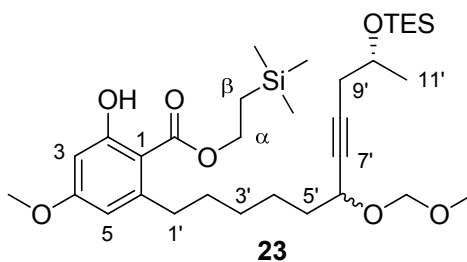

**Ester 23:** To a solution of **21** (100 mg, 0.30 mmol, 1.1 equiv) in 0.65 ml abs. THF was added dropwise a 0.5 M solution of 9-BBN in THF (0.75 ml, 0.37 mmol, 1.2 equiv), and the mixture was stirred at rt for 1 h. A 2 M solution of  $K_3PO_4$  (267  $\mu$ l, 0.53 mmol, 2 equiv) was added to the mixture (solution A). In a separate flask, 2-(trimethylsilyl)ethyl 2-bromo-6-hydroxy-4-methoxybenzoate (**22**) (92 mg, 0.26 mmol, 1 equiv) was added to a mixture of trifurylphosphine (37 mg, 0.16 mmol, 0.6 equiv) and  $Pd(OAc)_2$  (9 mg, 0.04 mmol, 0.15 equiv) in 1 ml of degassed abs. DME (solution B). Solution B was stirred for 5 min (with the color changing from red to yellow) and solution A was added dropwise at rt. The reaction mixture was refluxed for 1.5 h and then adsorbed on Celite and purified by FC (hexane/ $Et_2O$  20:1  $\rightarrow$  10:1) to give **23** (133 mg, 83%) as a colorless oil.

$R_f$  = 0.28 (hexane/ $Et_2O$  10:1).

**$^1H$ -NMR** (400.1 MHz,  $CDCl_3$ ):  $\delta$  11.83 (s, 1H, 2-OH); 6.32-6.33 (d,  $J$  = 2.9 Hz, 1H, H-3); 6.27 (d,  $J$  = 2.9 Hz, 1H, H-5); 4.71 (dd, 2H, MOM- $CH_2$ ); 4.39-4.44 (m, 2H, H- $\alpha$ ); 4.32-4.30 (m, 1H, H-6'); 3.94-3.91 (m, 1H, H-10'); 3.79 (s, 3H, 4- $CH_3$ ); 3.36 (s, 3H, MOM- $CH_3$ ); 2.88 (t,  $J$  = 7.7 Hz, 2H, H-1'); 2.42-2.27 (m, 2H, H-9'); 1.72-1.68 (m, 2H, H-5'); 1.59-1.51 (m, 2H, H-2'); 1.50-1.48 (m, 2H, H-4'); 1.42-1.36 (m, 2H, H-3'); 1.23 (d,  $J$  = 7.1 Hz, 3H, H-11'); 1.13-1.17 (m, 2H, H- $\beta$ ); 0.95 (t,  $J$  = 8.2 Hz, 9H,  $SiCH_2CH_3$ ); 0.59 (q,  $J$  = 8.2 Hz, 6H,  $SiCH_2CH_3$ ); 0.09 (s, 9H,  $SiCH_3$ ).

**$^{13}C$ -NMR** (100.6 MHz,  $CDCl_3$ ):  $\delta$  171.8 (C=O); 165.7 (C-2); 163.9 (C-4); 147.9 (C-6); 110.8 (C-5); 105.1 (C-1); 99.0 (C-3); 94.0 (MOM- $CH_2$ ); 83.4 (C-8'); 80.4 (C-7'); 67.6 (C-10'); 65.9 (C-6'); 63.8 (C- $\alpha$ ); 55.7 (MOM- $CH_3$ ); 55.4 (4-O- $CH_3$ ); 36.9 (C-1'); 36.1 (C-5'); 32.0 (C-2'); 29.9 (C-9'); 29.6 (C-3'); 25.5 (C-4'); 23.5 (C-11'); 17.7 (C- $\beta$ ); 6.9 ( $SiCH_2CH_3$ ); 5.0 ( $SiCH_2CH_3$ ); -1.4 ( $Si-CH_3$ ).

**IR** (neat,  $\nu/cm^{-1}$ ) 950, 2875, 1646, 1613, 1576, 1251, 1157, 1038, 837, 743, 732, 726.

**HRMS (EI):**  $m/z$  calcd for  $C_{32}H_{56}NaO_7Si_2$   $[M-Na]^+$ : 631.3457, found: 631.3457.

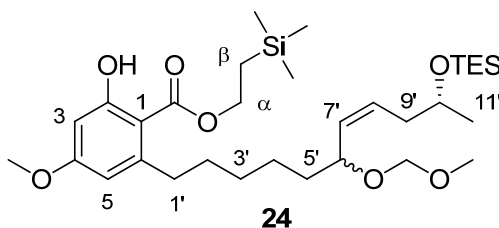

**Ester 24:** To a solution of **23** (924 mg, 1.52 mmol, 1 equiv) in 40 ml  $EtOAc$  was added *Lindlar* catalyst (162 mg, 0.08 mmol, 0.05 equiv) and the suspension was

vigorously stirred under a hydrogen atmosphere (balloon); after every 30 min the flask was flushed with argon and the progress of the reaction was assessed by MS and TLC. After 3 h the reaction was complete. The mixture was filtered through Celite, the solvent was evaporated and the residue was purified by FC (hexane/EtOAc 50:1 → 20:1 → 10:1) to give **24** (853 mg, 92%) as a colorless oil.

$R_f$  = 0.35 (hexane/EtOAc 10:1).

**$^1\text{H-NMR}$**  (400.1 MHz,  $\text{CDCl}_3$ ):  $\delta$  11.83 (s, 1H, 2-OH); 6.33 (d, 1H,  $J$  = 2.6 Hz, H-3); 6.27 (d, 1H,  $J$  = 2.6 Hz, H-5); 5.67-5.60 (m, 1H, H-8'); 5.29 (t, 1H,  $J$  = 9.8 Hz, H-7'); 4.46-4.67 (m, 2H, MOM- $\text{CH}_2$ ); 4.44-4.39 (m, 2H, H- $\alpha$ ); 4.36-4.30 (m, 1H, H-6'); 3.88-3.81 (m, 1H, H-10'); 3.79 (s, 3H, 4-O- $\text{CH}_3$ ); 3.34 (s, 3H, MOM- $\text{CH}_3$ ); 2.88 (t, 2H,  $J$  = 8.0 Hz, H-1'); 2.31-2.22 (m, 2H, H-9'); 1.65-1.52 (m, 3H, H-2', H-5'); 1.44-1.26 (m, 5H, H-3', H-4', H-5'); 1.26 (d, 3H,  $J$  = 2.1 Hz, H-11); 1.26-1.09 (m, 5H, H- $\beta$  (2H), 0.95 (t, 9H,  $J$  = 8.0 Hz,  $\text{Si}(\text{CH}_2\text{CH}_3)_3$ ); 0.59 (q, 6H,  $J$  = 8.0 Hz,  $\text{Si}(\text{CH}_2\text{CH}_3)_3$ ); 0.09 (s, 9H,  $\text{Si}(\text{CH}_3)_3$ ).

**$^{13}\text{C-NMR}$**  (100.6 MHz,  $\text{CDCl}_3$ ):  $\delta$  171.8 (C=O); 165.7 (C-2); 163.9 (C-4); 148.0 (C-6); 131.6 (C-7'); 130.1 (C-8'); 110.8 (C-5); 105.1 (C-1); 99.0 (C-3); 93.5 (MOM- $\text{CH}_2$ ); 71.0/71.1 (C-6'); 68.3/68.4 (C-10'); 63.8 (C- $\alpha$ ); 55.4 (4-O- $\text{CH}_3$ /MOM- $\text{CH}_3$ ); 37.9/38.0 (C-9'); 37.0 (C-1'); 35.8/35.9 (C-5'); 32.1 (C-2'); 30.0 (C-3'); 25.6/25.8 (C-4'); 23.6/23.7 (C-11'); 17.7 (C- $\beta$ ); 7.0 ( $\text{Si}(\text{CH}_2\text{CH}_3)_3$ ); 5.0/5.1 ( $\text{Si}(\text{CH}_2\text{CH}_3)_3$ ); -1.4 ( $\text{Si}(\text{CH}_3)_3$ ).

**IR** (neat,  $\text{v}/\text{cm}^{-1}$ ): 2950, 2875, 1646, 1613, 1577, 1320, 1251, 1204, 1157, 1096, 1037, 837, 743, 725.

**HRMS (ESI)**:  $m/z$  calcd for  $\text{C}_{32}\text{H}_{58}\text{NaO}_7\text{Si}_2$   $[\text{M}-\text{Na}]^+$ : 633.3613, found: 633.3616.

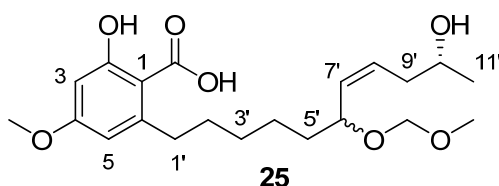

**Seco acid 25**: To a solution of **24** (746 mg, 1.22 mmol, 1 equiv) in THF (45 ml) was added TBAF (1 M in THF; 2.4 ml, 2.44 mmol, 2 equiv) and the reaction mixture was stirred for 2 h. Sat aq.  $\text{NH}_4\text{Cl}$  was then added and the mixture was extracted with EtOAc (3 x 10 ml). The combined organic extracts were dried over  $\text{MgSO}_4$ , filtered and the solvent was evaporated *in vacuo*. The crude product was purified by FC (EtOAc/MeOH 100:0 → 10:1 → 2:1) to give **25** (436 mg, 90%) as a light-brown resin.

$R_f$  = 0.43 (EtOAc/MeOH 10:1).

**$^1\text{H-NMR}$**  (400.1 MHz,  $\text{CDCl}_3$ ):  $\delta$  6.25 (s, 1H, H-3/H-5); 5.17 (s, 1H, H-3/H-5); 5.58-5.45 (m, 1H, H-8'); 5.30-5.22 (m, 1H, H-7'); 4.71-4.43 (m, 2H, MOM- $\text{CH}_2$ ); 4.33-4.28 (m, 1H, H-6'); 3.89-3.81 (m, 1H, H-10'); 3.73 (s, 3H, 4-O- $\text{CH}_3$ ); 3.32 (s, 3H, MOM- $\text{CH}_3$ ); 2.35-2.12 (m, 2H, H-9'); 3.13-2.94 (m, 2H, H-1'); 1.79-1.15 (m, 11H, H-2', H-3', H-4', H-5', H-11').

**IR** (neat,  $\nu/\text{cm}^{-1}$ ): 3367, 2933, 2877, 1610, 1582, 1430, 1375, 1157, 1034, 843.

**HRMS (ESI)**:  $m/z$  calcd for  $\text{C}_{21}\text{H}_{32}\text{NaO}_7$   $[\text{M}-\text{Na}]^+$ : 419.2040, found: 419.2040.

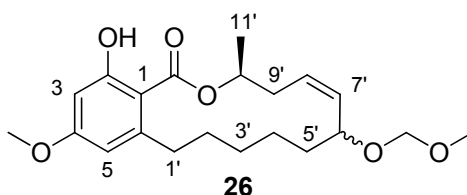

**Protected macrolactone 26**: To solution of **25** (427 mg, 1.08 mmol, 1 equiv) in toluene (150 ml, 0.007 M) and THF (4 ml) were added  $\text{PPh}_3$  (565 mg, 2.16 mmol, 2 equiv) and DEAD (350  $\mu\text{l}$ , 2.16 mmol, 2 equiv) and the reaction mixture was stirred for at rt for 1 h. The whole mixture was then adsorbed on Celite and purified by FC (hexane/EtOAc 10:1  $\rightarrow$  5:1  $\rightarrow$  3:1) to give **26** (261 mg, 64%) as an off-white solid.

$R_f$  = 0.80 (hexane/EtOAc 1:1).

**$^1\text{H-NMR}$**  (400.1 MHz,  $\text{CDCl}_3$ ):  $\delta$  12.14 (s, 1H, 2-OH); 6.32-6.31 (m, 1H, H-3); 6.29-6.27 (m, 1H, H-5); 5.60-5.92 (m, 1H, H-8'); 5.51-5.46 (m, 0.4H, H-7'); 5.44-5.37 (m, 1H, H-10'); 5.34-5.28 (m, 0.6H, H-7'); 5.10-5.03 (m, 0.5H, H-10'); 4.53-4.70 (m, 2H, MOM- $\text{CH}_2$ ); 4.40-4.56 (m, 1H, H-6'); 3.79 (s, 3H, 4-O- $\text{CH}_3$ ); 3.37 (s, 3H, MOM- $\text{CH}_3$ ); 3.21-3.07 (m, 1H, H-1'); 2.98-2.88 (m, 1H, H-9'); 2.73-2.51 (m, 1H, H-1'); 2.247-2.27 (m, 1H, H-9'); 1.78-1.72 (m, 1H, H-5'); 1.62-1.22 (m, 10H, H-2', H-3', H-4', H-5', H-11' (d, 3H,  $J$  = 6.7 Hz)).

**$^{13}\text{C-NMR}$**  (100 MHz,  $\text{CDCl}_3$ ):  $\delta$  172.0 (C=O); 166.3 (C-2); 165.4 (C-2); 164.1 (C-4); 164.0 (C-4); 148.2 (C-6); 148.1 (C-6); 133.1 (C-7'); 132.1 (C-7'); 130.7 (C-8'); 127.6 (C-8'); 109.5 (C-5); 109.2 (C-5); 105.8 (C-1); 105.1 (C-1); 98.8 (C-3); 98.7 (C-3); 93.6 (MOM- $\text{CH}_2$ ); 93.5 (MOM- $\text{CH}_2$ ); 72.7 (C-10'); 71.9 (C-10'); 70.6 (C-6'); 69.1 (C-6'); 55.3/55.4 (MOM- $\text{CH}_3$ /4-O- $\text{CH}_3$ ); 36.1 (C-1'); 35.1 (C-9'); 34.4 (C-1'); 33.4/33.5 (C-5'/C-9'); 30.9 (C-2'); 29.3 (C-2'); 27.4 (C-3'); 27.1 (C-3'); 24.6 (C-4'); 22.8 (C-4'); 21.4 (C-11'); 18.5 (C-11').

**IR** (neat,  $\nu/\text{cm}^{-1}$ ): 2932, 2860, 1736, 1640, 1612, 1576, 1249, 1204, 1158, 1033, 829.

**HRMS (ESI)**:  $m/z$  calcd for  $\text{C}_{21}\text{H}_{30}\text{NaO}_6$   $[\text{M}-\text{Na}]^+$ : 401.19346, found: 401.1935.

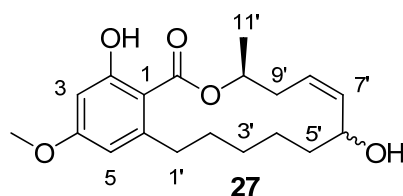

**Macrolactone 27**: To a solution of **26** (235 mg, 0.62 mmol) in MeOH (21 ml) was added sulfonic acid resin (3.1 mmol/g; 220 mg, 0.68 mmol) and the mixture was refluxed for 3 h. The resin was then removed by filtration and washed with MeOH.

The filtrate was evaporated *in vacuo* and the residue was purified by FC (hexane/EtOAc 4:1 → 2:1 → 1:1) to give **27** (152 mg, 73%) as colorless crystals.

$R_f$  = 0.47 (hexane/EtOAc 1:1).

**M.p.**: 66 °C.

**<sup>1</sup>H-NMR** (400.1 MHz, CDCl<sub>3</sub>): δ 12.09 (s, 0.45H, 2-OH); 11.78 (s, 0.4H, 2-OH); 6.32 (d,  $J$  = 2.6 Hz, 1H, H-3); 6.29 (d,  $J$  = 2.6 Hz, 1H, H-5); 5.82-5.76 (m, 0.45H, H-8'); 5.65-5.60 (m, 0.5H, H-7'); 5.56-5.50 (m, 0.54H, H-8'); 5.48-5.38 (m, 1.5H, H-10' (1H), H-7' (0.5H)); 4.61-4.56 (m, 0.55H, H-6'); 4.48-4.53 (m, 0.45H, H-6'); 3.22-3.06 (m, 1H, H-1'); 2.97-2.84 (m, 1H, H-9'); 2.73-2.53 (m, 1H, H-1'); 2.49-2.42 (m, 0.5H, H-9'); 2.35-2.29 (m, 0.5H, H-9'); 1.79-1.68 (m, 1H, H-5'); 1.67-1.30 (m, 9.45H, H-2', H-3', H-4', H-5', H-11 (d,  $J$  = 6.6 Hz)); 1.22-1.17 (m, 0.55H, H-4').

**<sup>13</sup>C-NMR** (100 MHz, CDCl<sub>3</sub>): δ 171.8 (C=O); 171.3 (C=O); 166.1 (C-2); 165.5 (C-2); 164.1 (C-4); 164.1 (C-4); 148.1 (C-6); 135.7 (C-7'); 134.9 (C-7'); 129.1 (C-8'); 126.0 (C-8'); 109.3 (C-5); 109.3 (C-5); 105.7 (C-1); 105.2 (C-1); 98.8 (C-3); 98.8 (C-3); 72.6 (C-10'); 71.8 (C-10'); 67.8 (C-6'); 66.5 (C-6'); 55.4 (4-O-CH<sub>3</sub>); 36.1 (C-5'); 35.7 (C-5'); 35.4 (C-1'); 35.2 (C-9'); 34.4 (C-1'); 33.3 (C-9'); 30.5 (C-2'); 29.4 (C-2'); 27.4 (C-3'); 27.2 (C-3'); 24.4 (C-4'); 22.7 (C-4'); 21.4 (C-11'); 18.4 (C-11').

**IR** (neat,  $\nu/\text{cm}^{-1}$ ): 3440, 2932, 2856, 1739, 1637, 1611, 1575, 1248, 1201, 1158, 1040, 826.

**HRMS (ESI)**:  $m/z$  calcd for C<sub>19</sub>H<sub>26</sub>NaO<sub>5</sub> [M-Na]<sup>+</sup> 357.16725, found: 357.1672.

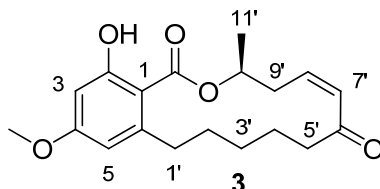

**Dideoxy L-783277 (3)**: To a solution of **27** (91 mg, 0.27 mmol, 1 equiv) in CH<sub>2</sub>Cl<sub>2</sub> (5 ml) was added DMP (15% in CH<sub>2</sub>Cl<sub>2</sub>; 400  $\mu$ l, 0.19 mmol, 0.7 equiv). The mixture was stirred for 30 minutes and a second portion of DMP (400  $\mu$ l, 0.19 mmol, 0.7 equiv) was added. After 1 h a third portion of DMP (330  $\mu$ l, 0.16 mmol, 0.6 equiv) was added. After 3 h the mixture was directly put on a column and purified by FC (hexane/EtOAc 5:1) to give **3** (65 mg, 72%) as a colorless crystals.

$R_f$  = 0.18 (hexane/EtOAc 10:1).

**M.p.**: 100 °C.

$[\alpha]_D^{20}$  = -24.5° ( $c$  = 0.89, CHCl<sub>3</sub>).

**<sup>1</sup>H-NMR** (400.1 MHz, CDCl<sub>3</sub>): δ 6.35-6.32 (m, 1H, H-3); 6.30-6.29 (m, 1H, H-7'); 6.24-6.23 (m, 1H, H-5); 5.92-5.86 (m, 1H, H-8'); 5.52-5.44 (m, 1H, H-10'); 3.79 (s, 3H, 4-OCH<sub>3</sub>); 3.29-3.20 (m, 1H, H-9'); 3.15-3.09 (m, 1H, H-1'); 2.64-2.57 (m, 1H, H-5'); 2.46-2.41 (m, 1H, H-9'); 2.40-2.32 (m, 1H, H-1'); 2.27-2.21 (m, 1H, H-5'); 2.09-2.02 (m, 1H, H-4'); 1.53-1.43 (m, 3H, H-3', H-2', H-4'); 1.40 (d,  $J$  = 5.7 Hz, 3H, H-11'); 1.36-1.23 (m, 2H, H-3' und H-2').

**<sup>13</sup>C-NMR** (100.6 MHz, CDCl<sub>3</sub>): δ 204.7 (C=O); 171.6 (C-6'); 166.3 (C-2); 164.1 (C-4); 147.8 (C-6); 138.9 (C-8'); 132.7 (C-7'); 110.5 (C-5); 104.8 (C-1); 99.1 (C-3); 72.4 (C-10'); 40.3 (C-5'); 55.4 (4-O-CH<sub>3</sub>); 37.3 (C-1'); 36.3 (C-9'); 31.4 (C-2'); 27.2 (C-3'); 24.0 (C-4'); 21.2 (C-11').

**IR** (near, ν/cm<sup>-1</sup>): 3060, 2928, 2854, 1728, 1685, 1642, 1616, 1575, 1319, 1254, 1205, 1162, 1039, 826.

**HRMS (ESI)**: *m/z* calcd for C<sub>19</sub>H<sub>24</sub>NaO<sub>5</sub> [M-Na]<sup>+</sup> 355.15159, found: 355.1516.

## 5. Individual IC<sub>50</sub> values for kinase inhibition by L-783277 and 1

**Table 1A:** Inhibition of protein kinases by RL L-783277, 1, 2, and 3<sup>a,b</sup>

| Kinase <sup>c</sup> | IC <sub>50</sub> [nM] |                  |           |                   |
|---------------------|-----------------------|------------------|-----------|-------------------|
|                     | L-783277              | 1                | 2         | 3                 |
| ALK                 | 810/740/740           | 850/730/710      | > 10000   | 3500/4400         |
| ERK2                | 950/1300              | 6600/6400        | > 10000   | > 10000           |
| EPHB4               | >10000                | 7400/7500        | > 10000   | > 10000           |
| cKIT                | 150/360/400           | 540/770/710      | 7600/8500 | > 10000           |
| LCK                 | 6200/7000             | 4800/4700        | > 10000   | > 10000           |
| MEK2 <sup>d</sup>   | 15 <sup>e</sup>       | N. D.            | N. D.     | 6840 <sup>e</sup> |
| MK5                 | 640 <sup>e</sup>      | N. D.            | N. D.     | > 10000           |
| MNK2                | N. D.                 | 150 <sup>e</sup> | N. D.     | > 10000           |
| PDGFRα <sup>f</sup> | 2.1/0.64/4.4          | 6.0/7.4/8.3      | 180/220   | 95/100            |
| RET                 | >10000                | 9900/7200        | >10000    | > 10000           |
| TYK2                | 4100/5600             | 4400/5700        | > 10000   | > 10000           |
| VEGFR2              | 2.0/3.4/0.6           | 4.7/5/3/5/6      | 230/190   | 170/190           |
